# Supplementary material for: Bioinspired Pyrano[2,3-f]chromen-8-ones: Ring C-Opened Analogues of Calanolide A: Synthesis and Anti-HIV-1 Evaluation
Source: MDPI journal article supplement (doi:10.3390/biomimetics9010044), 2024-01-11
Supplement: s1 [file s1]

# Supplementary Information

for

## Bioinspired Pyrano[2,3-*f*]chromen-8-ones: Ring C-Opened Analogues of Calanolide A. Synthesis and Anti-HIV-1 Evaluation

Igor A. Khalymbadzha <sup>1,\*</sup>, Ramil F. Fatykhov <sup>1</sup>, Ilya I. Butorin <sup>1</sup>, Ainur D. Sharapov <sup>1</sup>, Anastasia P. Potapova <sup>1</sup>, Nibin Joy Muthipeedika <sup>1</sup>, Grigory V. Zyryanov <sup>1</sup>, Vsevolod V. Melekhin <sup>1,2</sup>, Maria D. Tokhtueva <sup>1</sup>, Sergey L. Deev <sup>1</sup>, Marina K. Kukhanova <sup>3</sup>, Nataliya N. Mochulskaya <sup>1</sup> and Mikhail V. Tsurkan <sup>4,\*</sup>

<sup>1</sup> Department of Organic and Biomolecular Chemistry, Ural Federal University, 620002 Yekaterinburg, Russia; rf.fatykhov@urfu.ru (R.F.F.); iibutorin@urfu.ru (I.I.B.); a.d.sharapov@urfu.ru (A.D.S.); a.p.potapova@urfu.ru (A.P.P.); mnibinjoy@gmail.com (N.J.M.); g.v.zyryanov@urfu.ru (G.V.Z.); v.v.melekhin@urfu.ru (V.V.M.); maria.tokhtueva@urfu.ru (M.D.T.); deevsl@yandex.ru (S.L.D.); n.n.mochulskaya@urfu.ru (N.N.M.)

<sup>2</sup> Department of Medical Biology and Genetics, Ural State Medical University, 620028 Yekaterinburg, Russia

<sup>3</sup> Engelhardt Institute of Molecular Biology, 119991 Moscow, Russia; kukhan86@hotmail.com

<sup>4</sup> Leibniz Institute of Polymer Research Dresden, 01069 Dresden, Germany

\* Correspondence: i.a.khalymbadzha@urfu.ru (I.A.K.); tsurkan@ipfdd.de (M.V.T.)

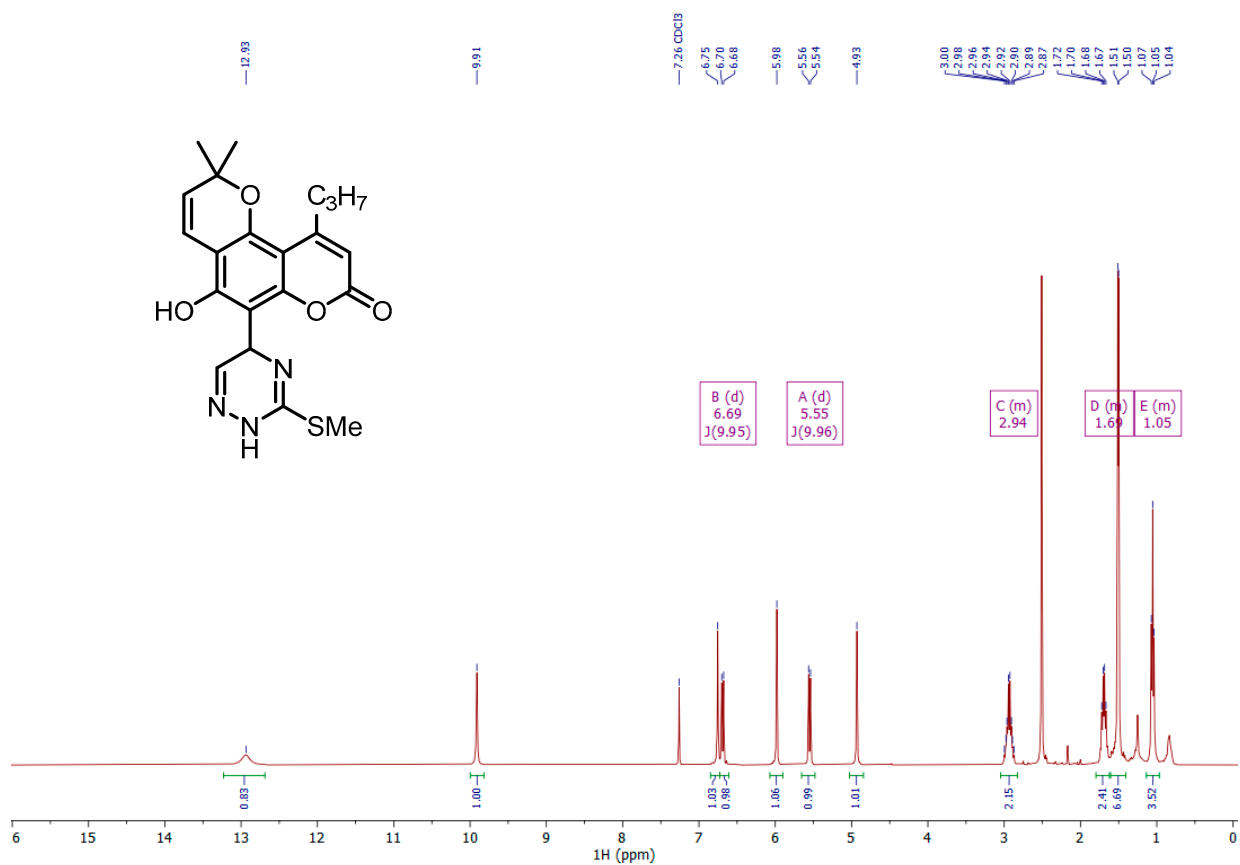

Supplementary Figure S1. <sup>1</sup>H NMR spectrum of 4a

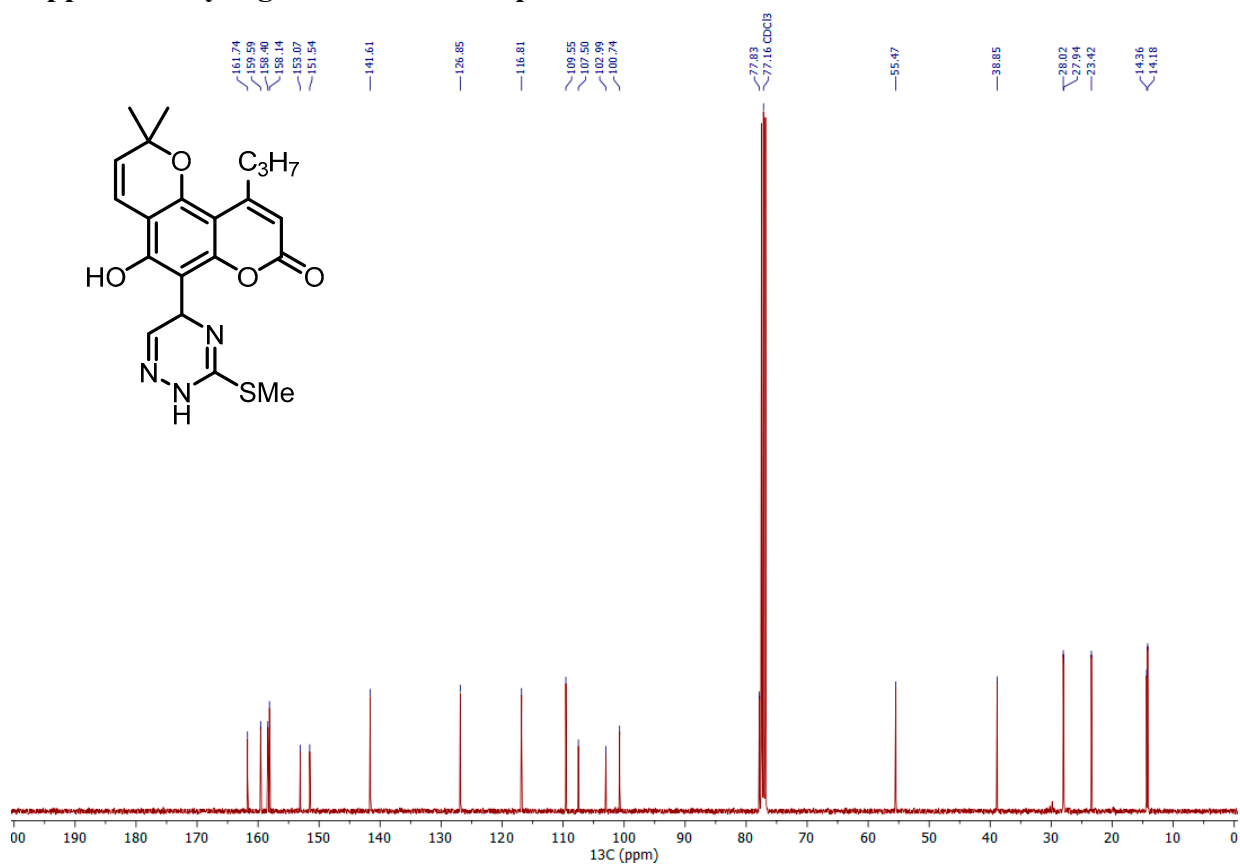

Supplementary Figure S2. <sup>13</sup>C NMR spectrum of 4a

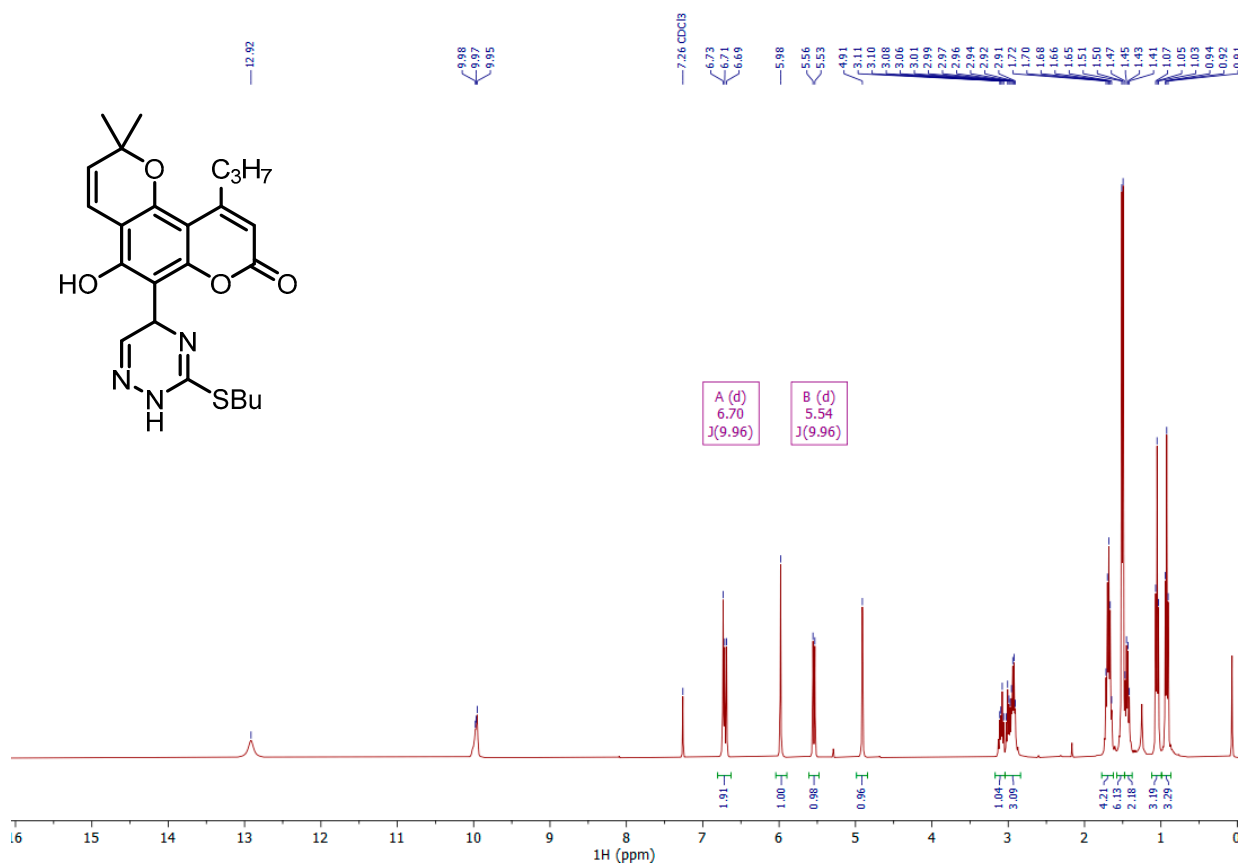

Supplementary Figure S3. <sup>1</sup>H NMR spectrum of 4b

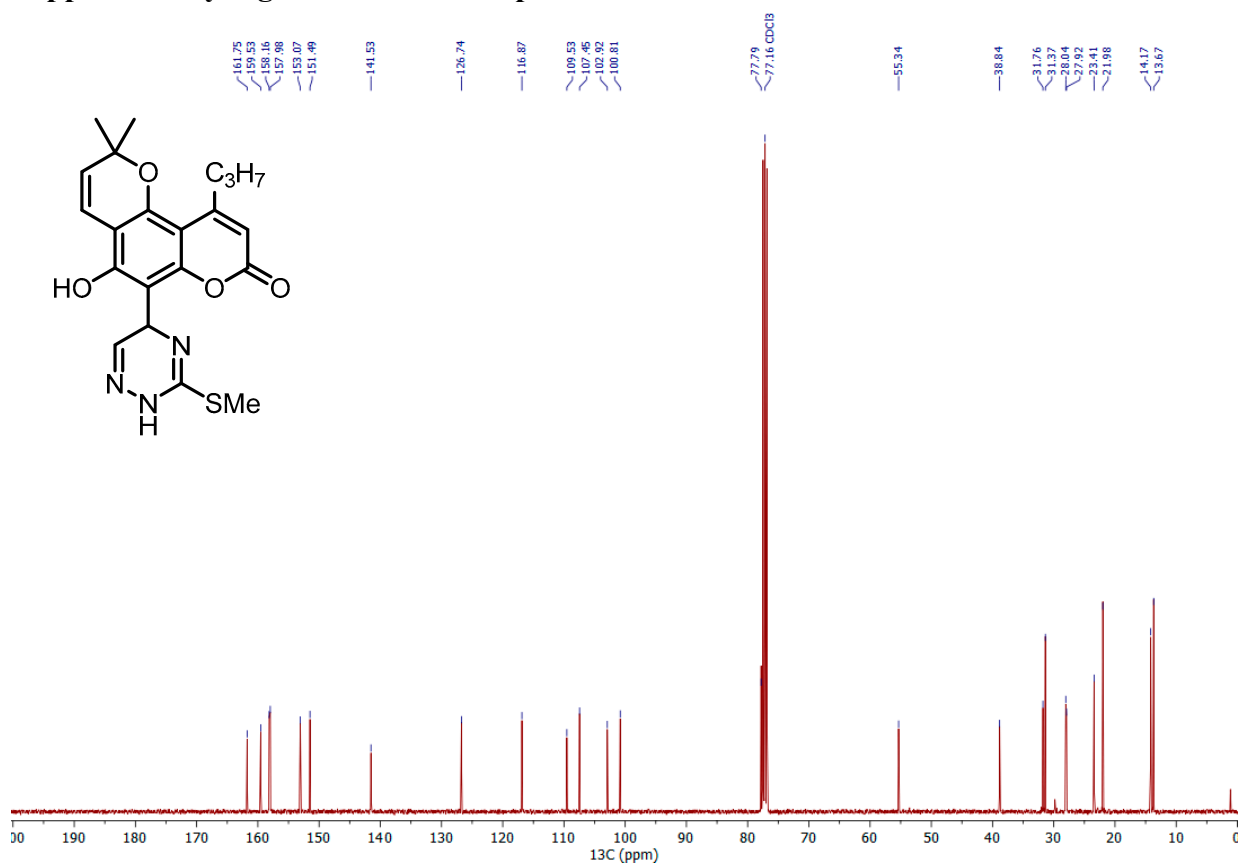

Supplementary Figure S4. <sup>13</sup>C NMR spectrum of 4b

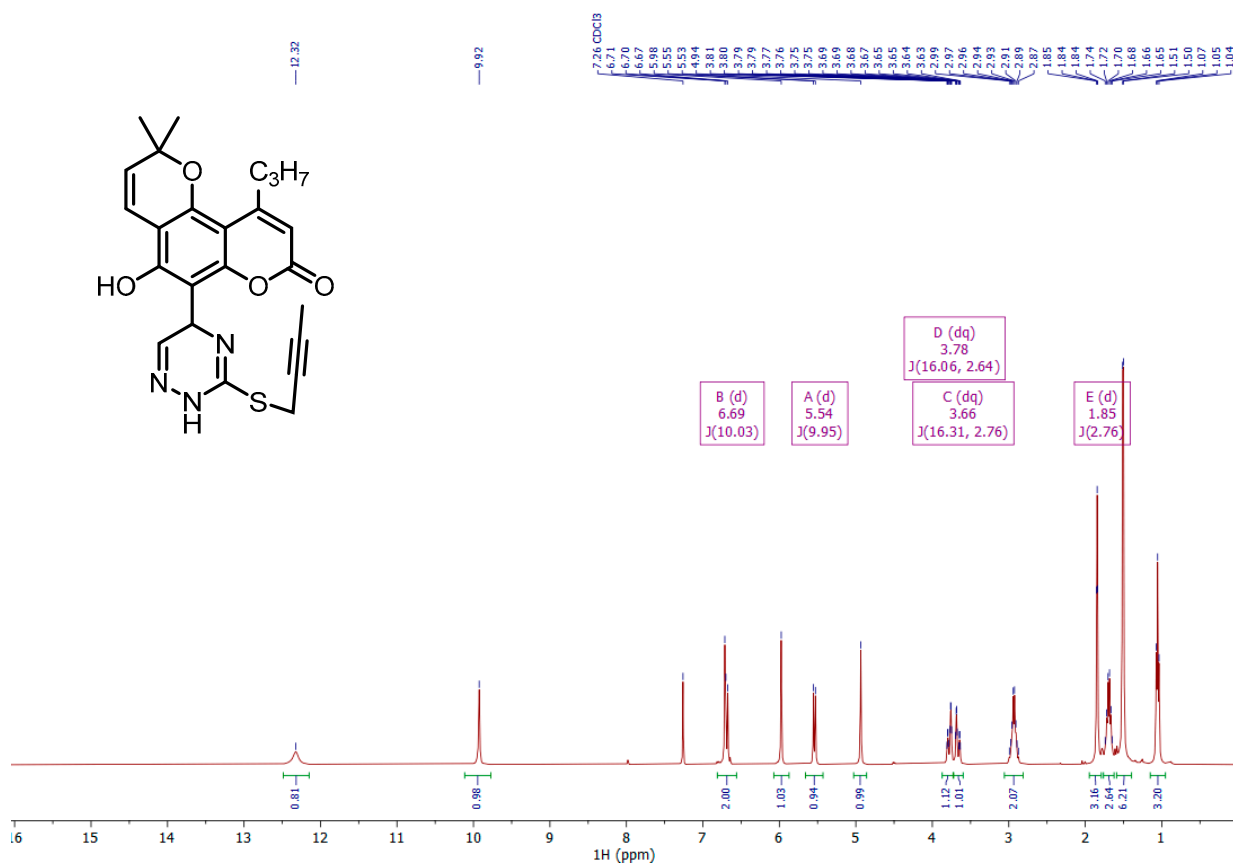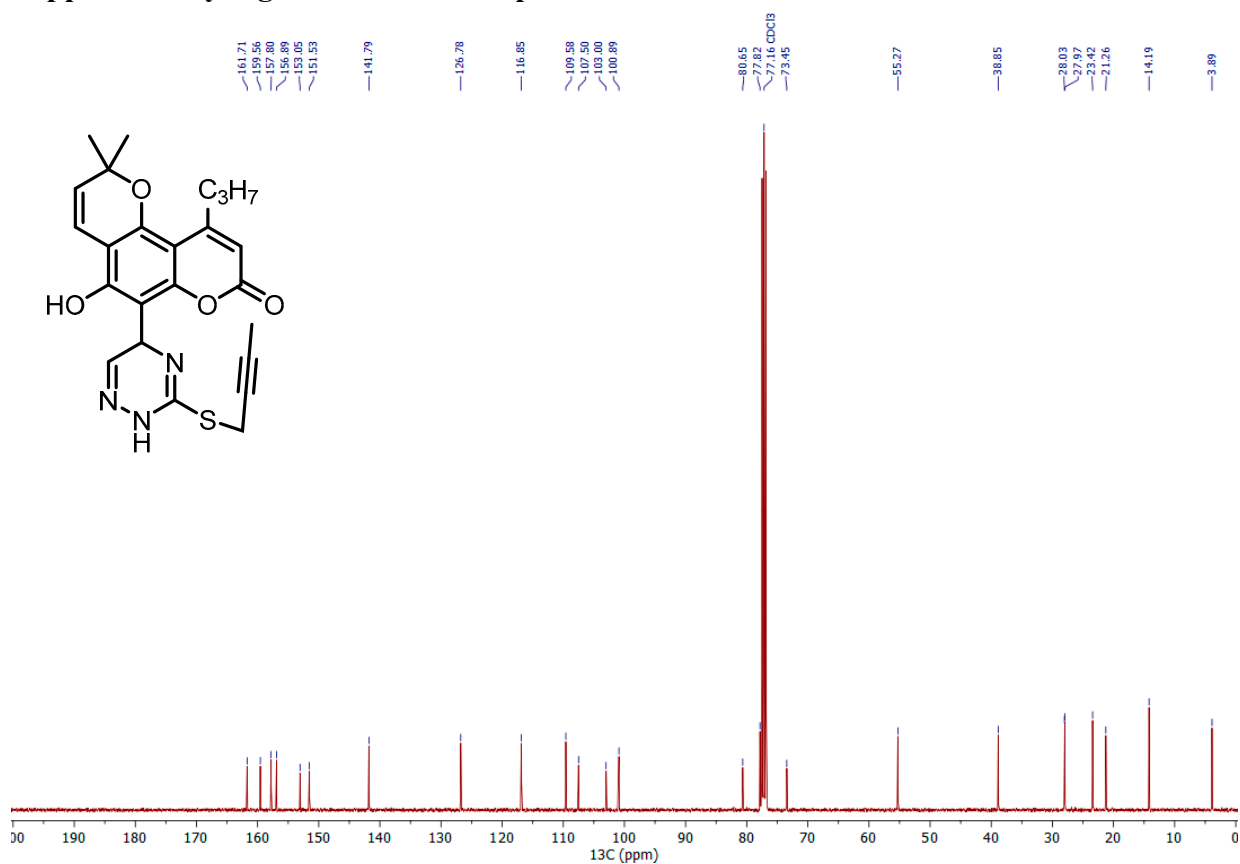

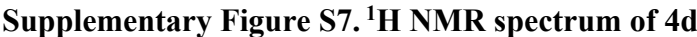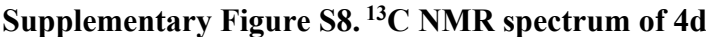

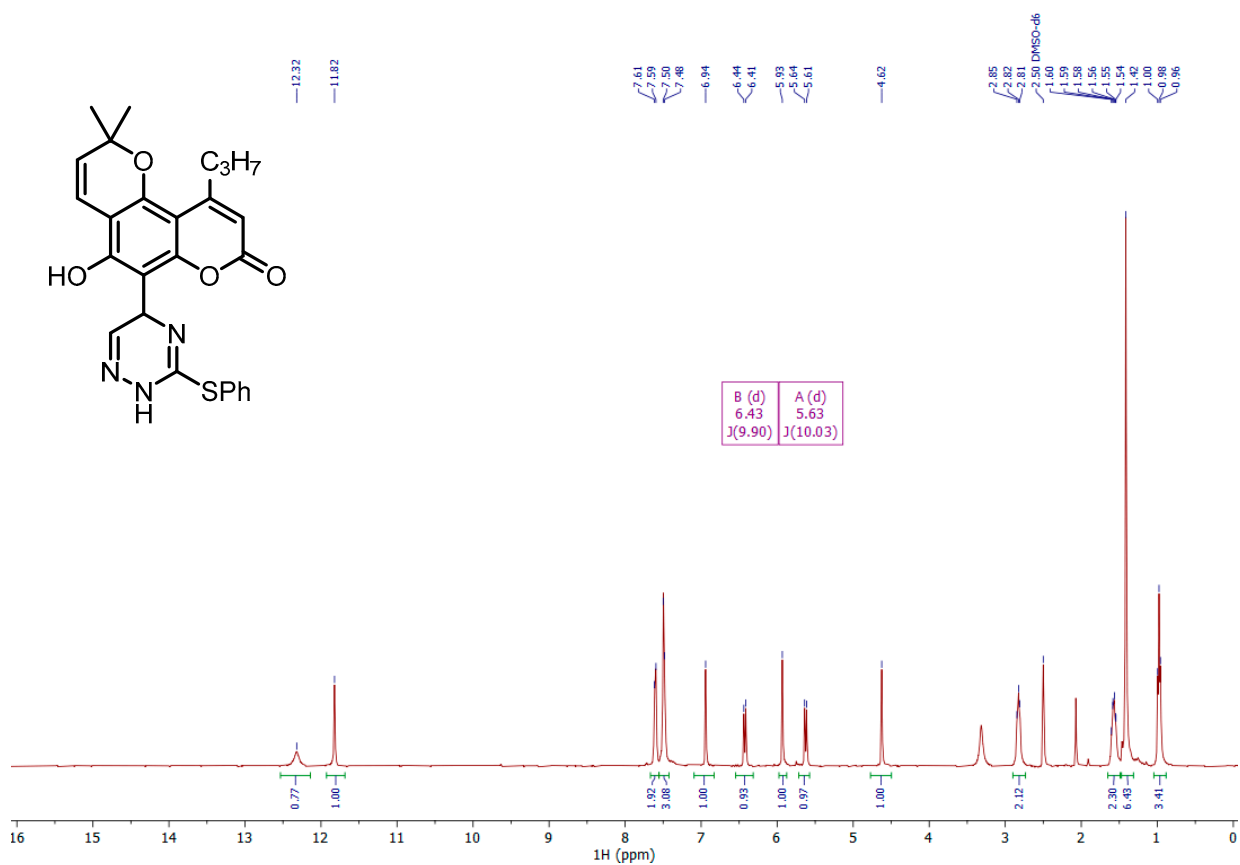

Supplementary Figure S9.  $^1\text{H}$  NMR spectrum of 4e

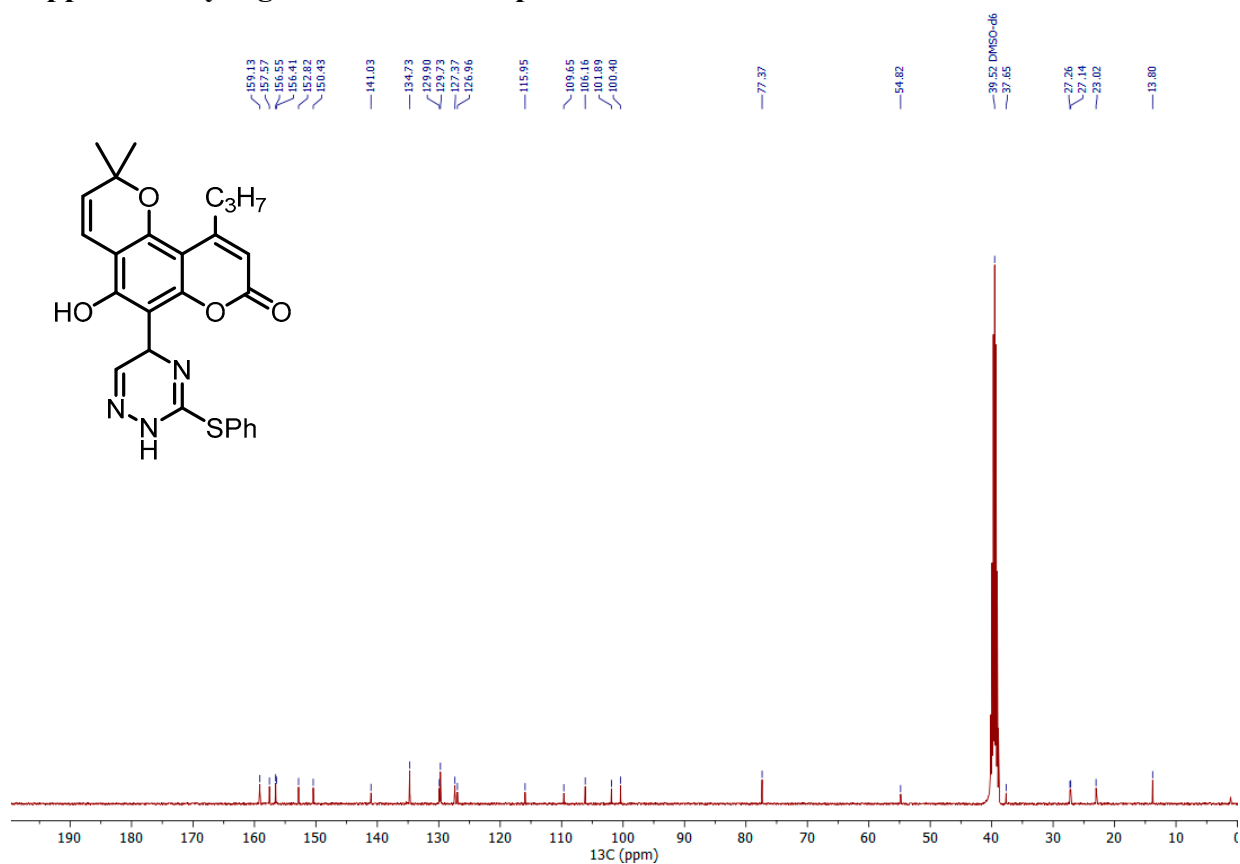

Supplementary Figure S10.  $^{13}\text{C}$  NMR spectrum of 4e

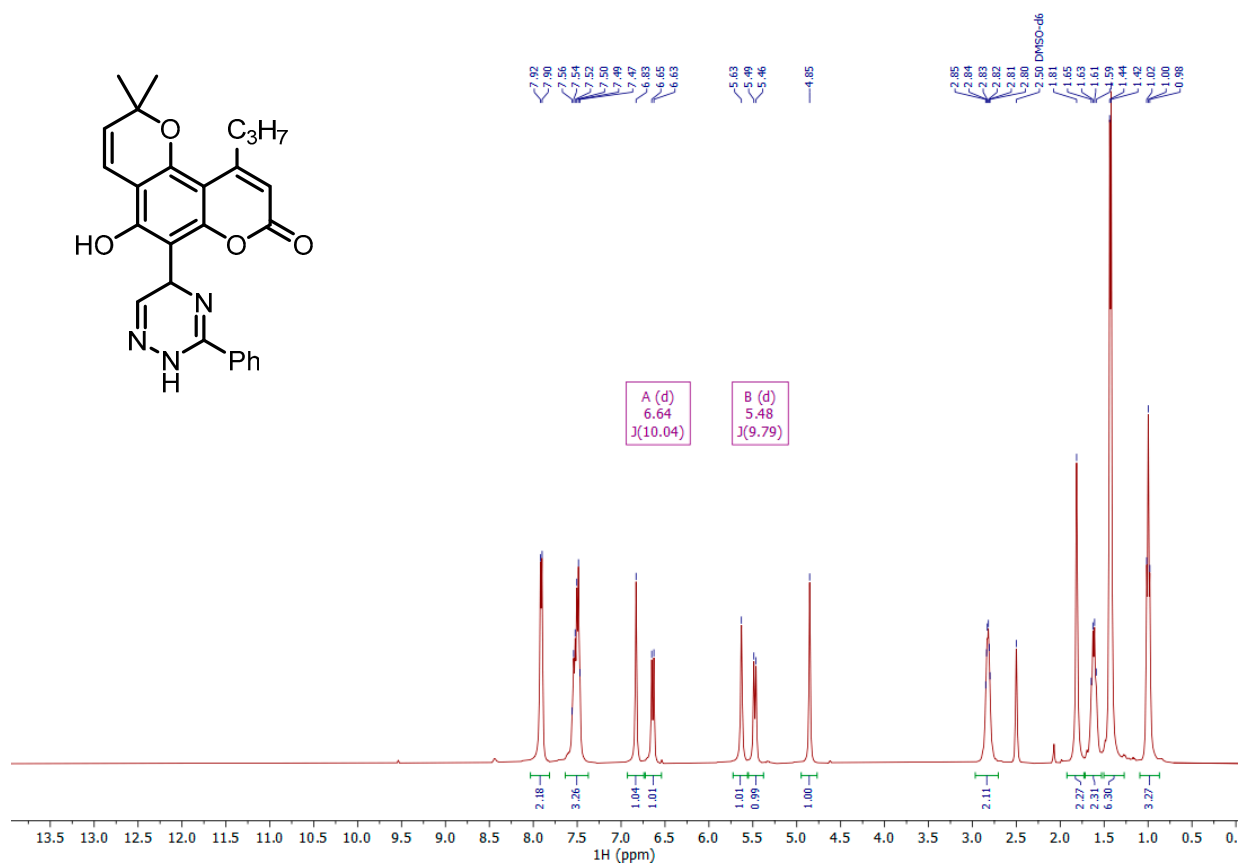

Supplementary Figure S11. <sup>1</sup>H NMR spectrum of 4f

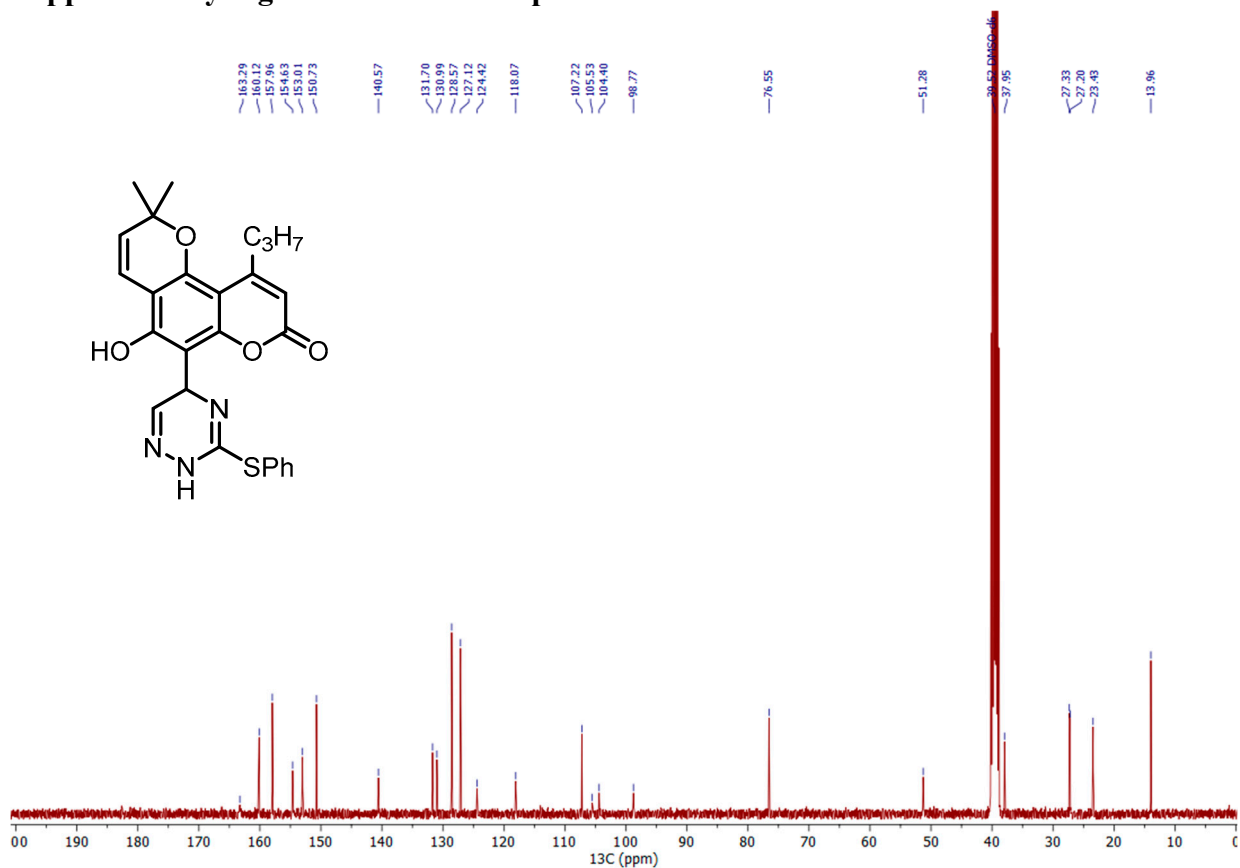

Supplementary Figure S12. <sup>13</sup>C NMR spectrum of 4f

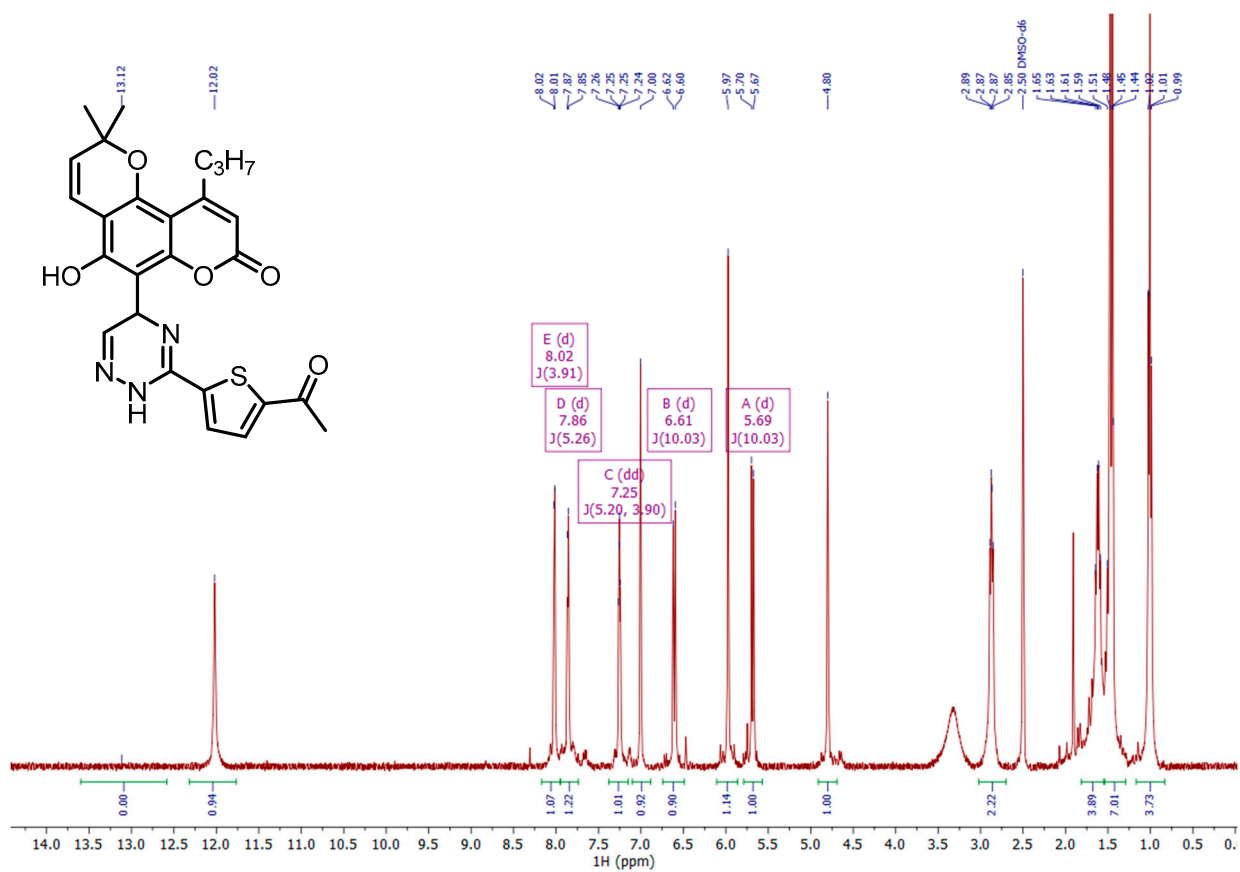

Supplementary Figure S13. <sup>1</sup>H NMR spectrum of 4g

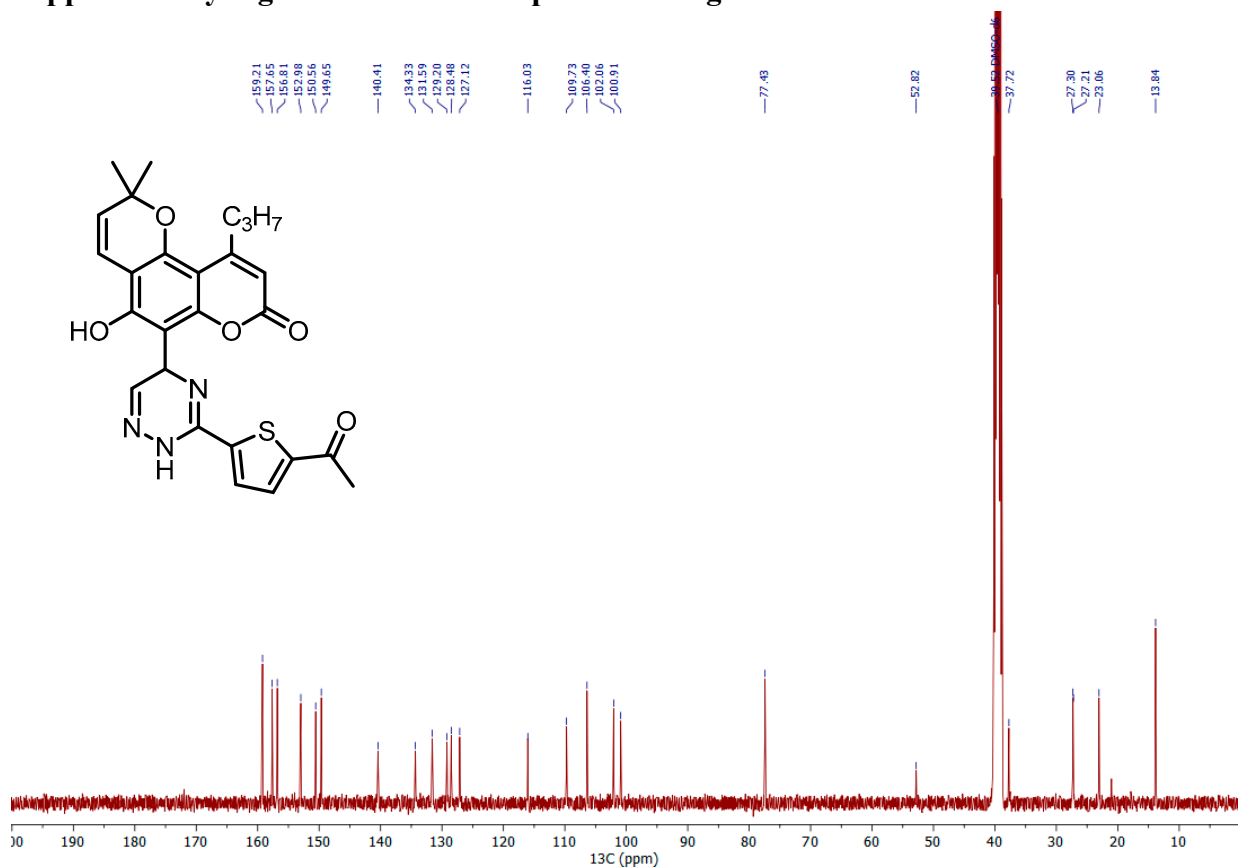

Supplementary Figure S14. <sup>13</sup>C NMR spectrum of 4g



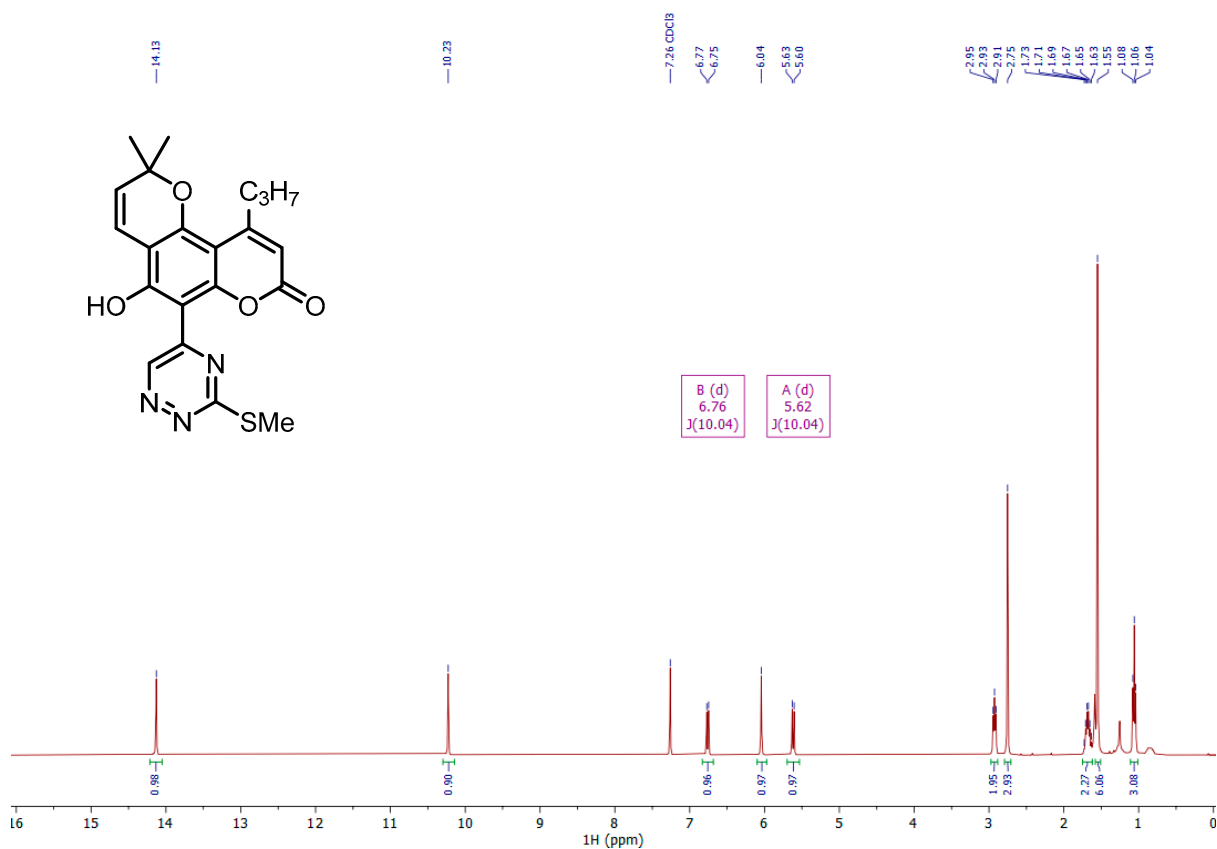

Supplementary Figure S15. <sup>1</sup>H NMR spectrum of 5a

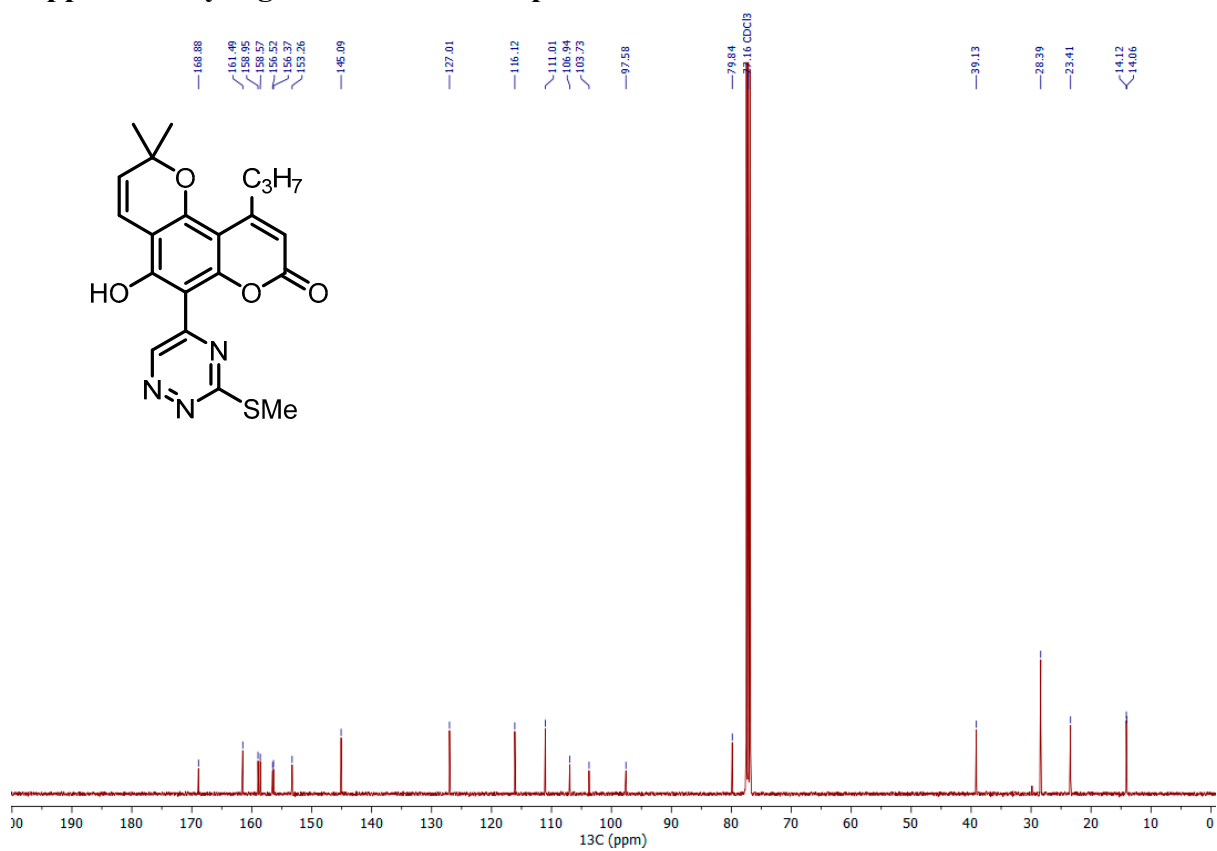

Supplementary Figure S16. <sup>13</sup>C NMR spectrum of 5a

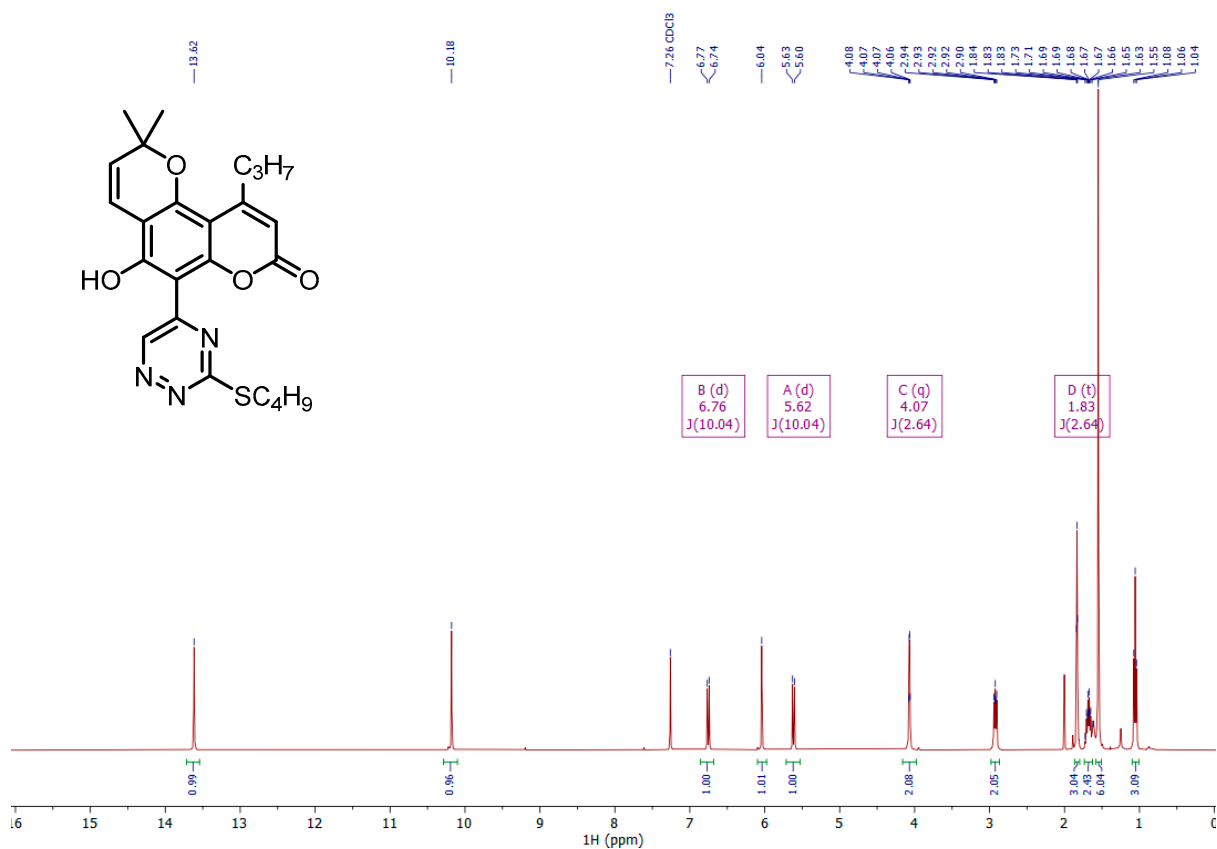

Supplementary Figure S17. <sup>1</sup>H NMR spectrum of 5b

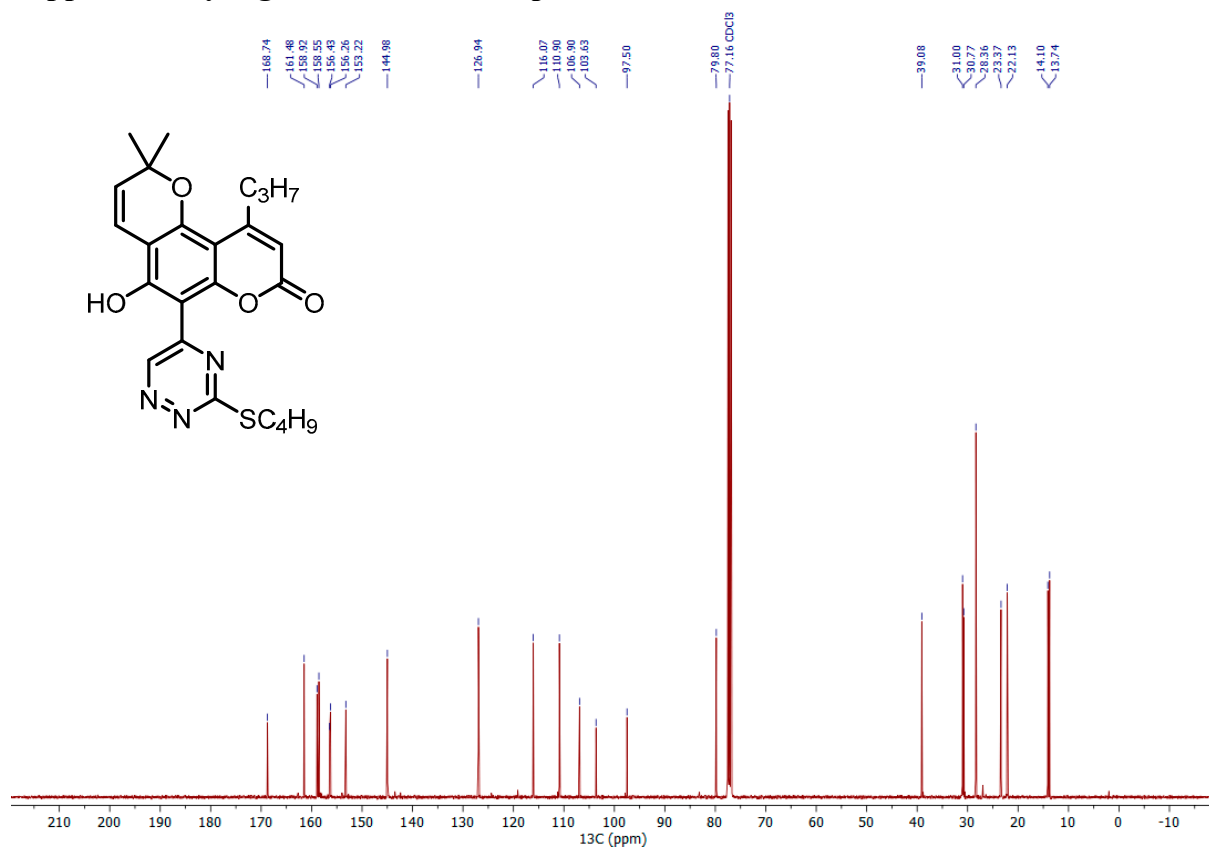

Supplementary Figure S18. <sup>13</sup>C NMR spectrum of 5b

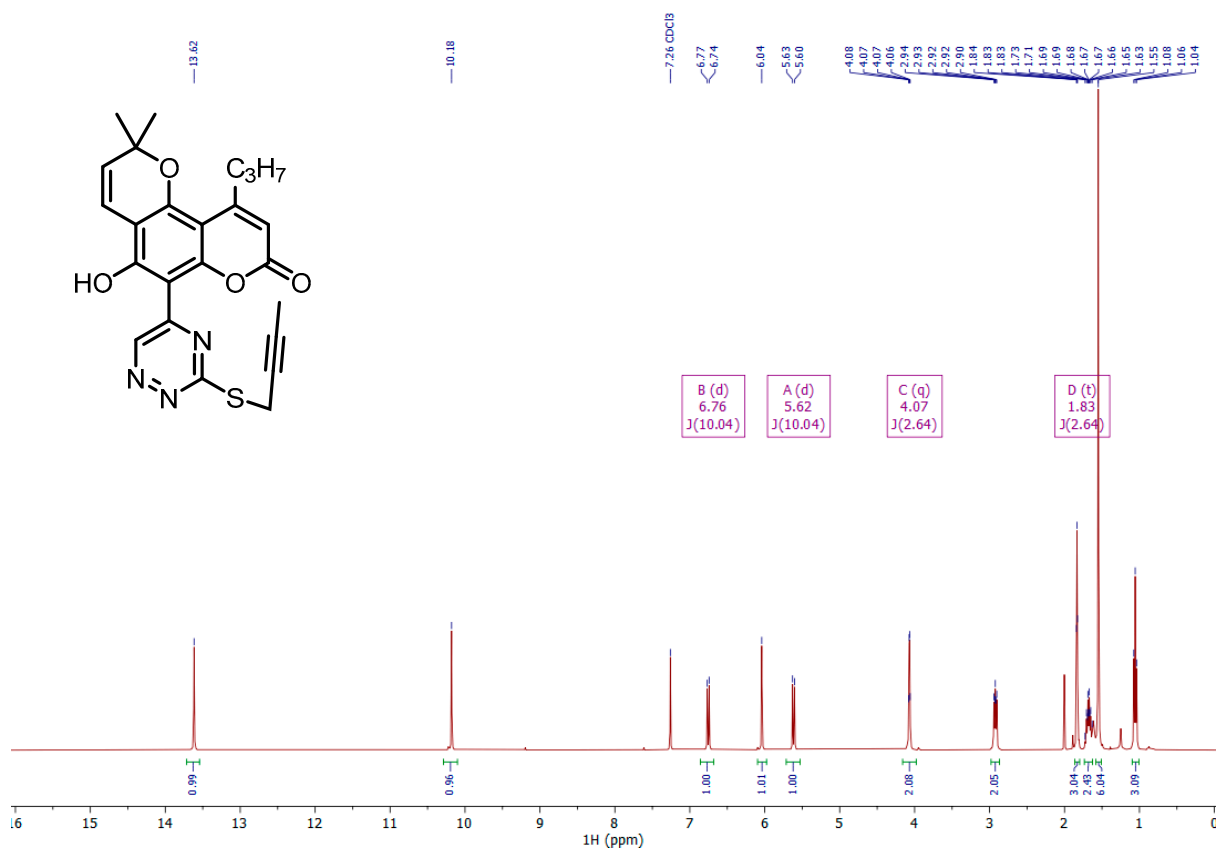

Supplementary Figure S19. <sup>1</sup>H NMR spectrum of 5c

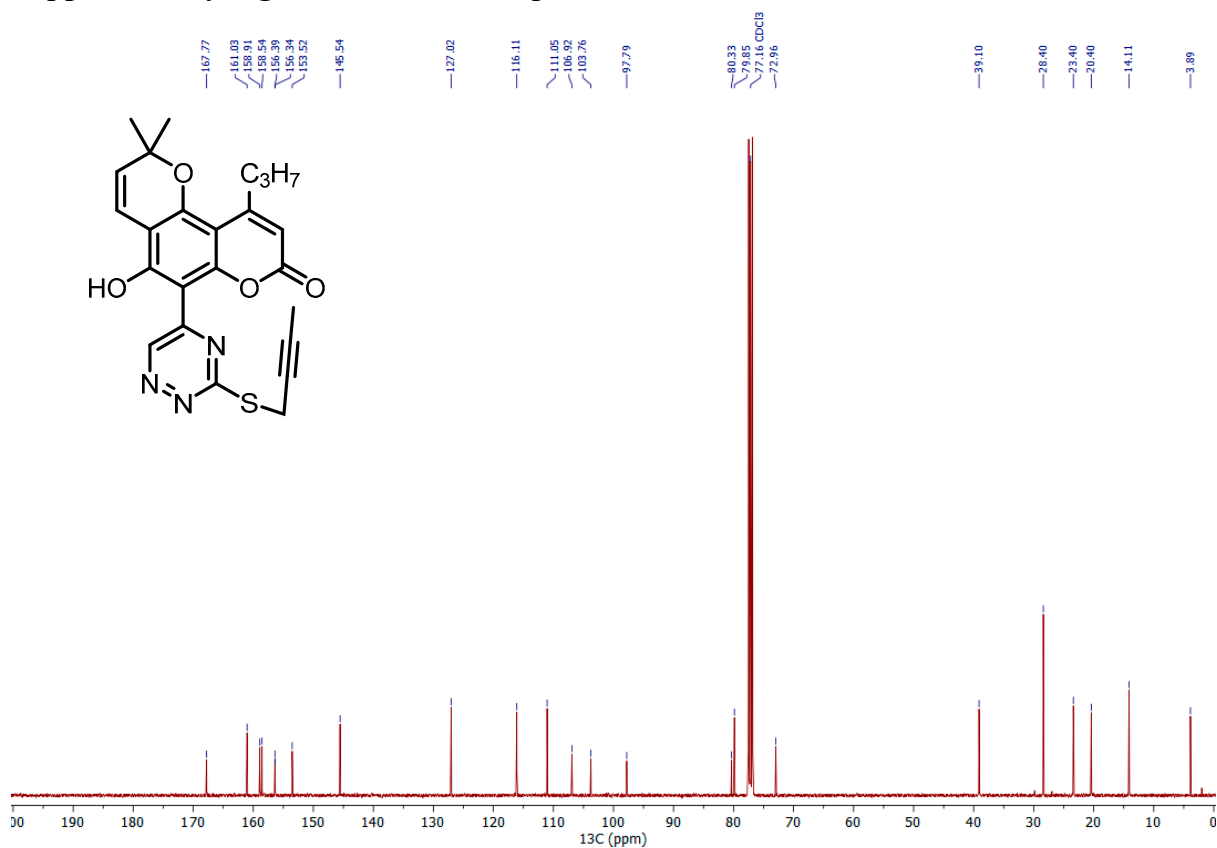

Supplementary Figure S20. <sup>13</sup>C NMR spectrum of 5c

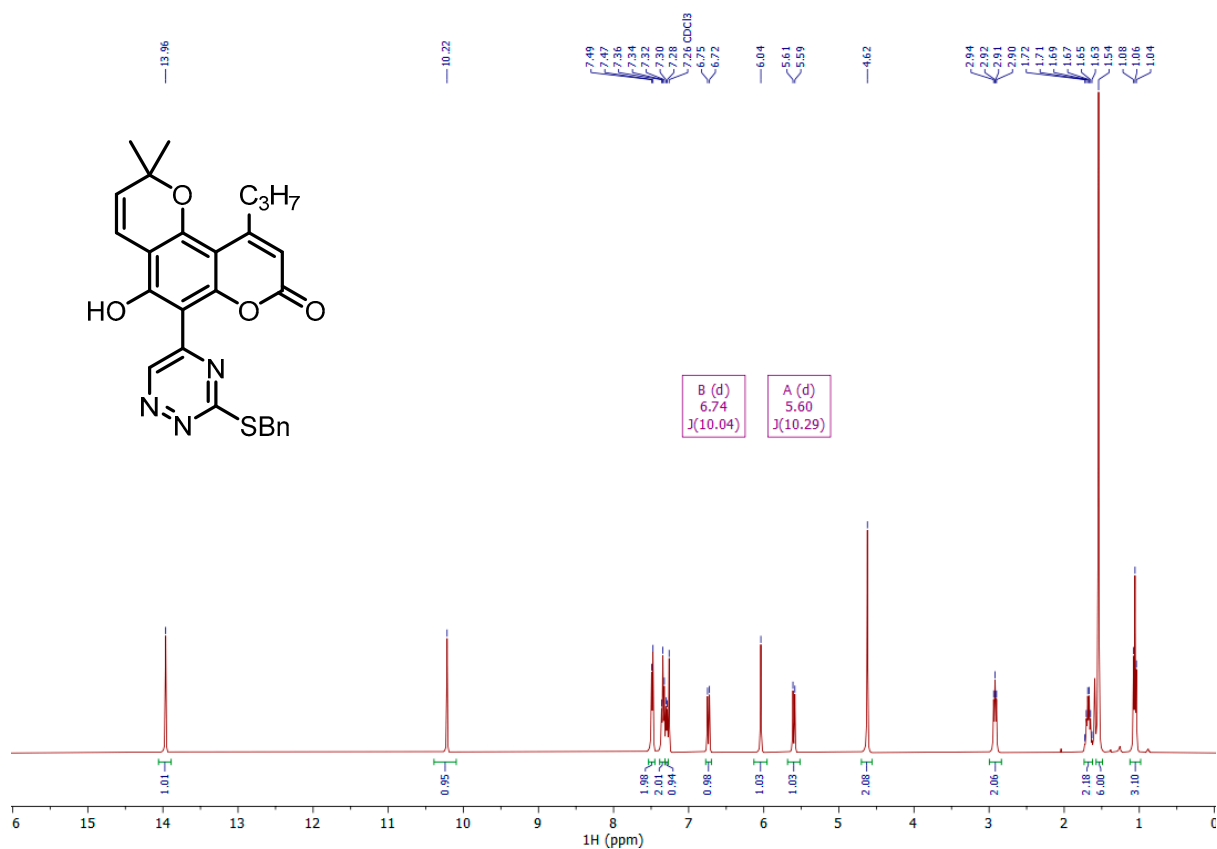

Supplementary Figure S21. <sup>1</sup>H NMR spectrum of 5d

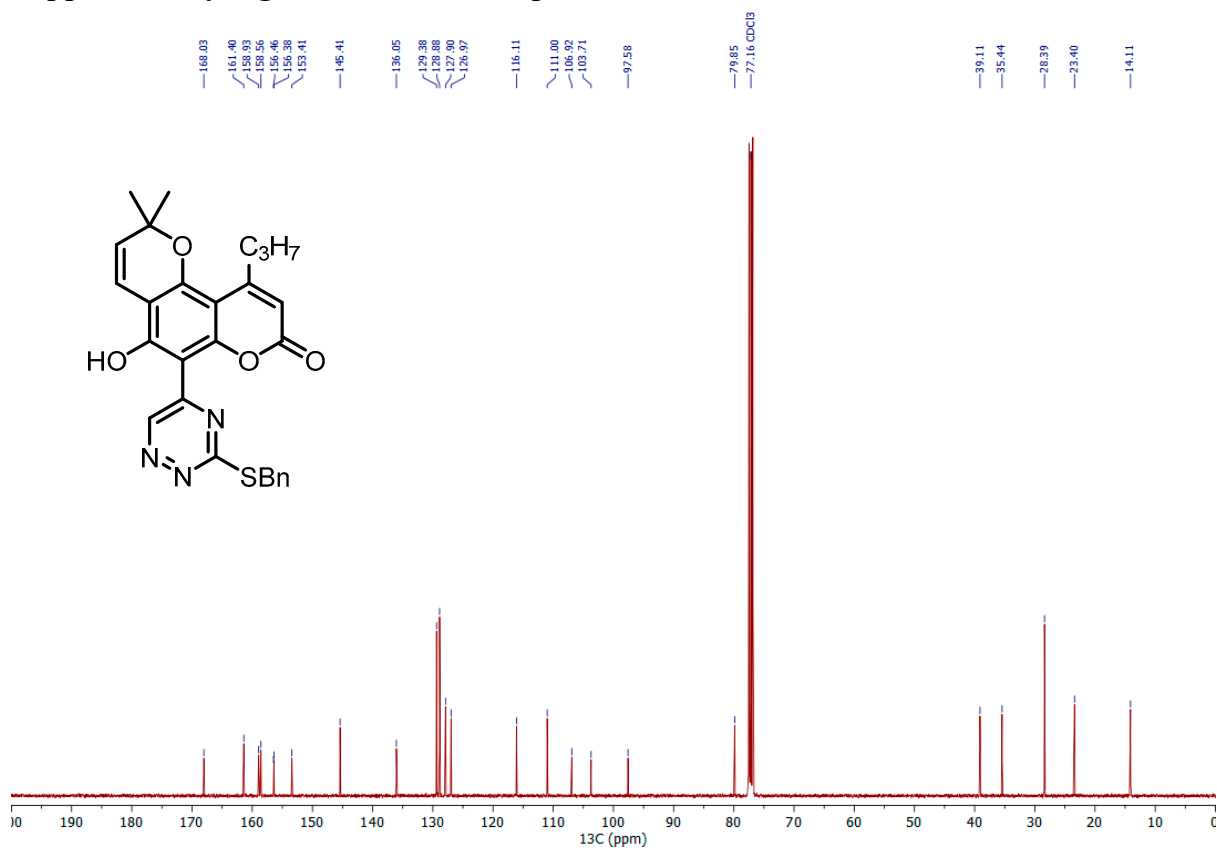

Supplementary Figure S22. <sup>13</sup>C NMR spectrum of 5d

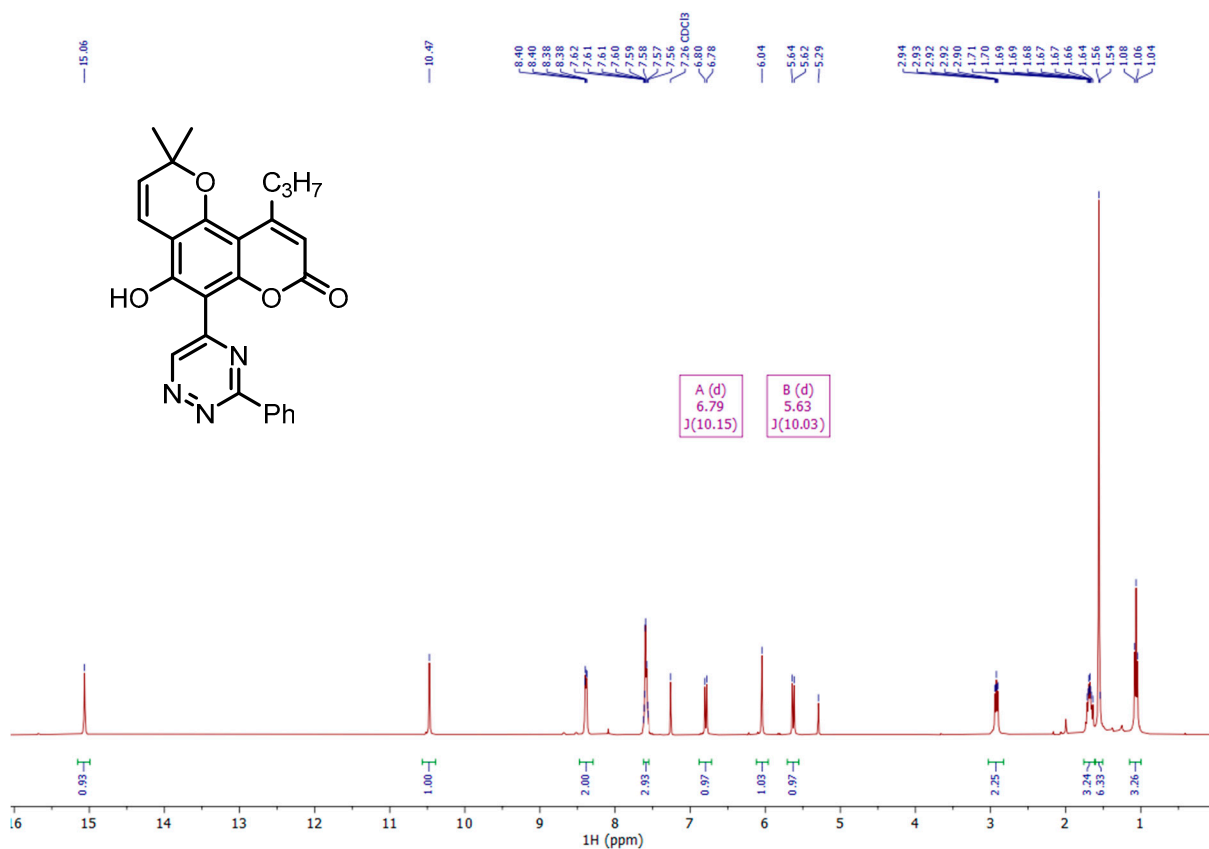

**Supplementary Figure S23. <sup>1</sup>H NMR spectrum of 5f**

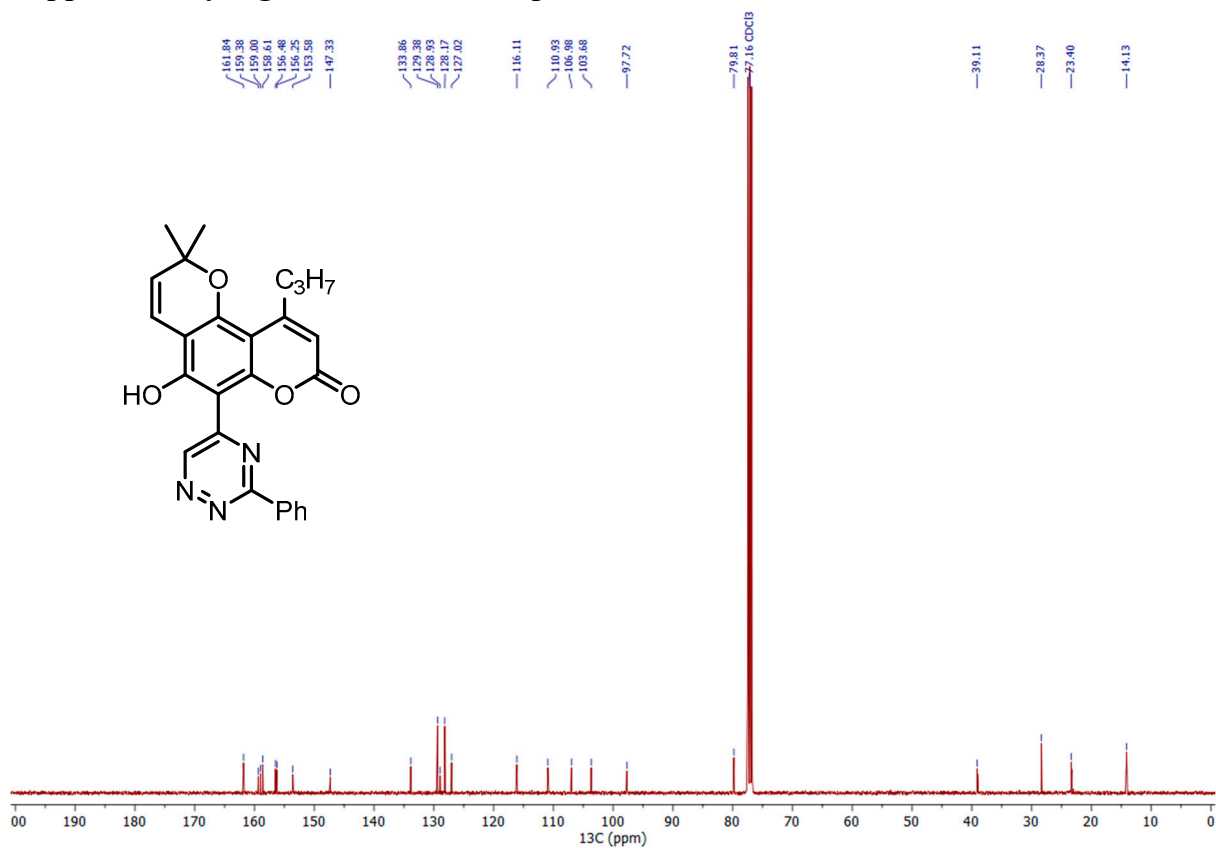

**Supplementary Figure S24. <sup>13</sup>C NMR spectrum of 5f**

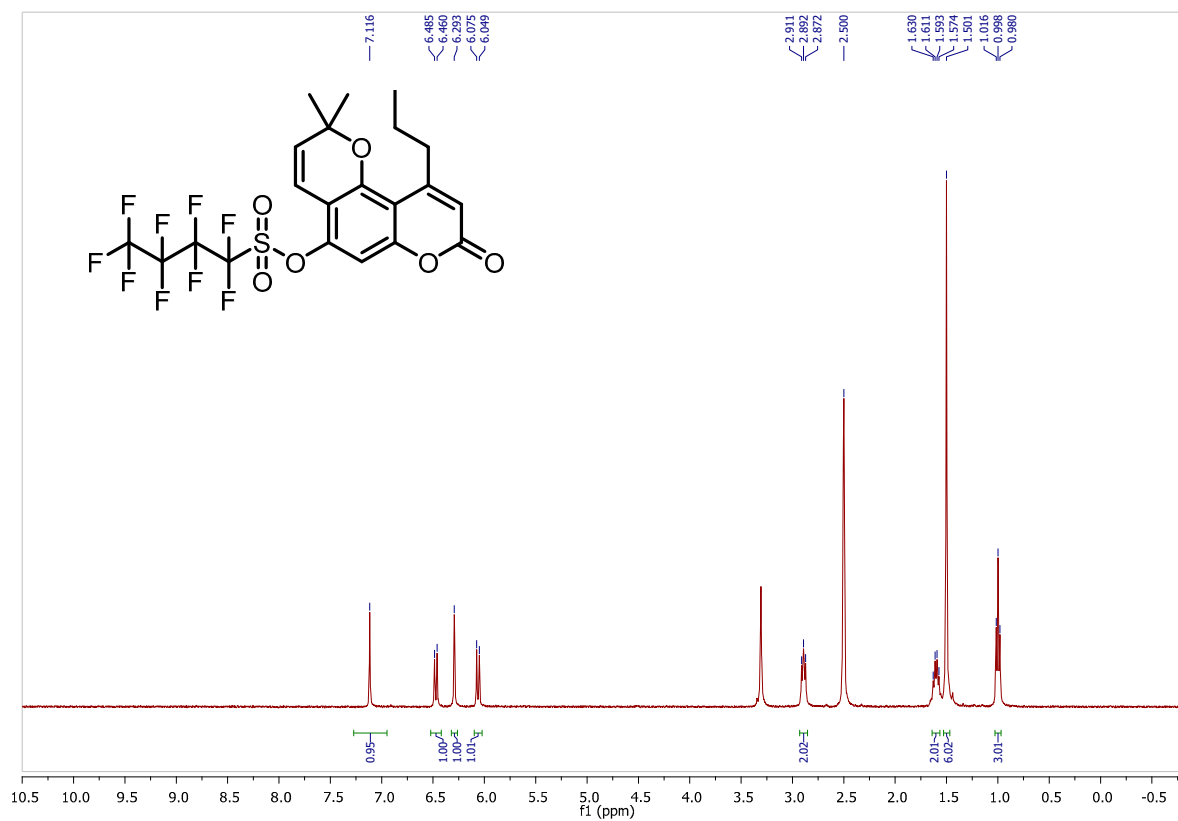

Supplementary Figure S25. <sup>1</sup>H NMR spectrum of 8

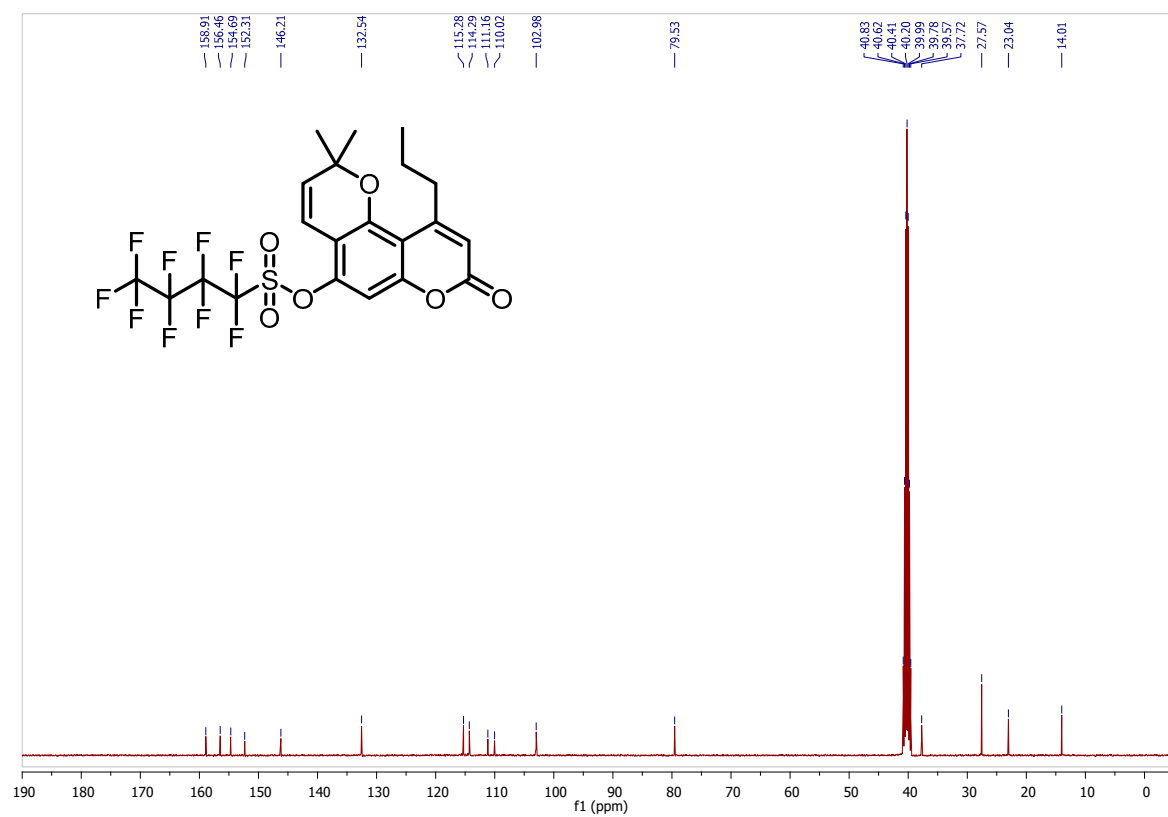

Supplementary Figure S26. <sup>13</sup>C NMR spectrum of 8

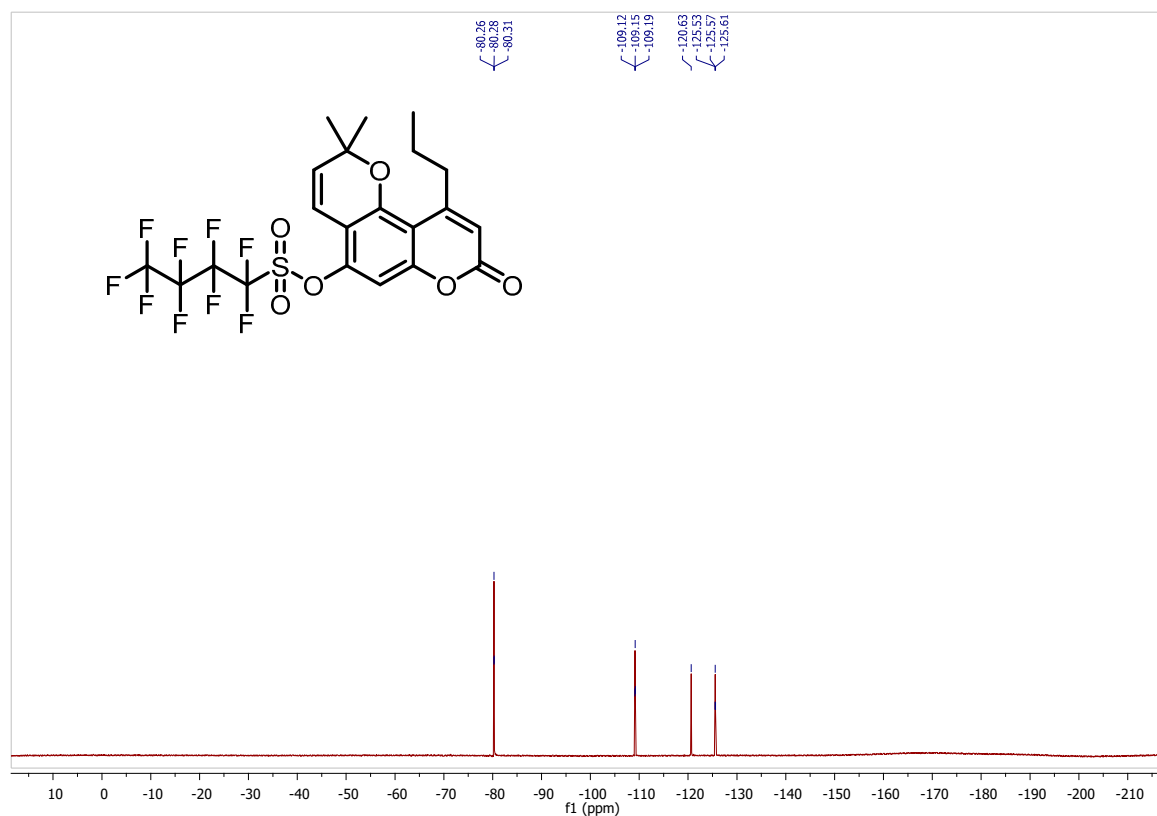

Supplementary Figure S27.  $^{19}\text{F}$  NMR spectrum of 8

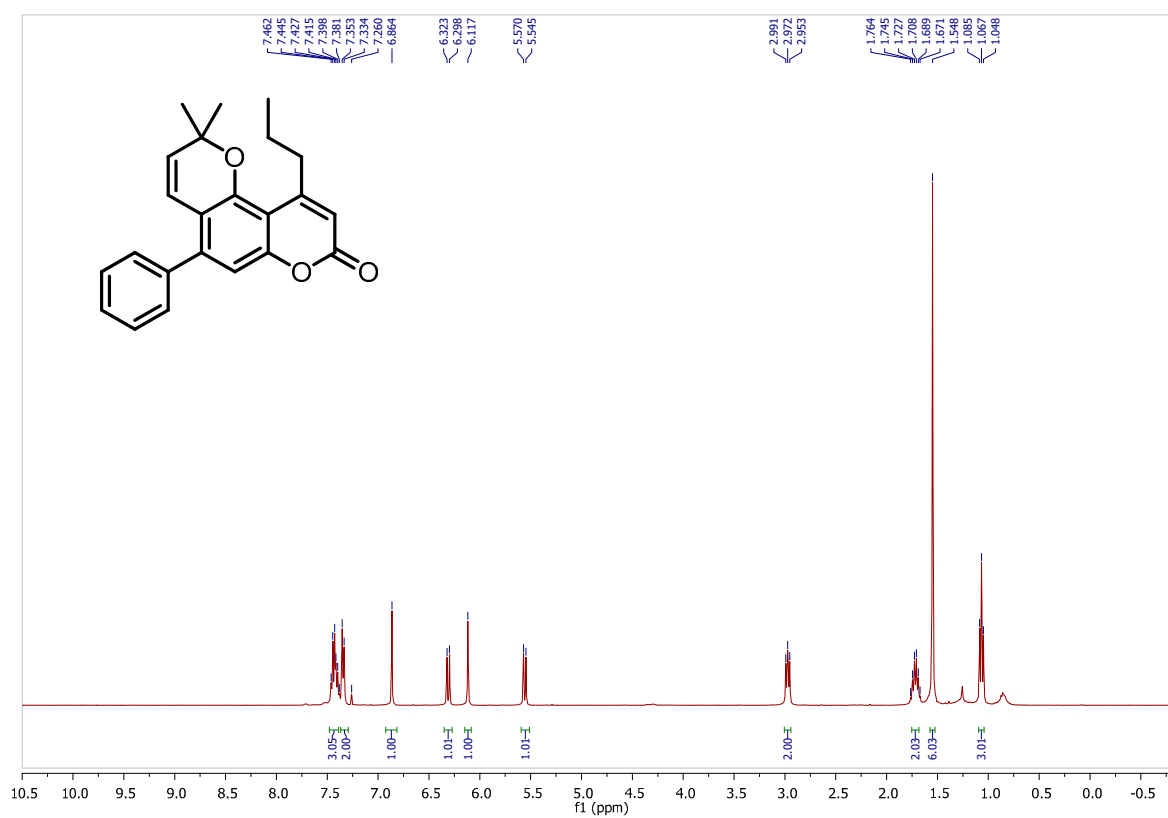

Supplementary Figure S28.  $^1\text{H}$  NMR spectrum of 7a

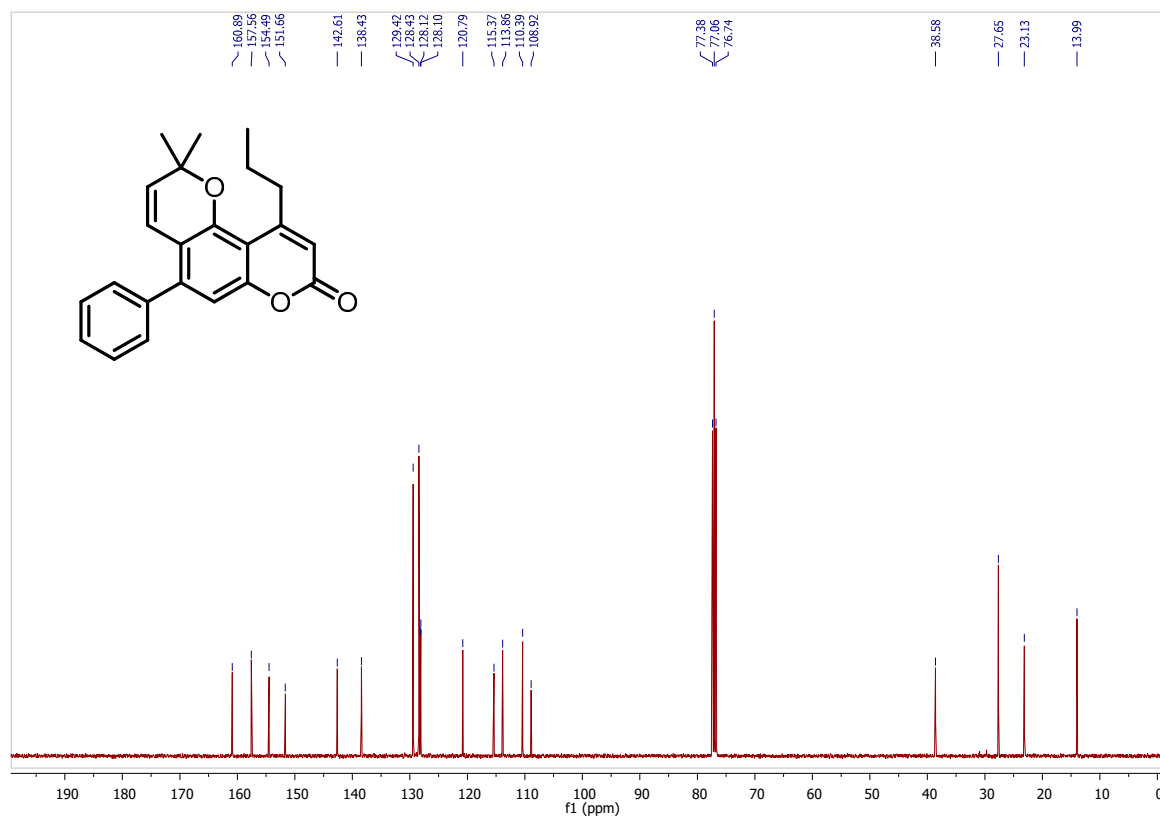

Supplementary Figure S29. <sup>13</sup>C NMR spectrum of 7a

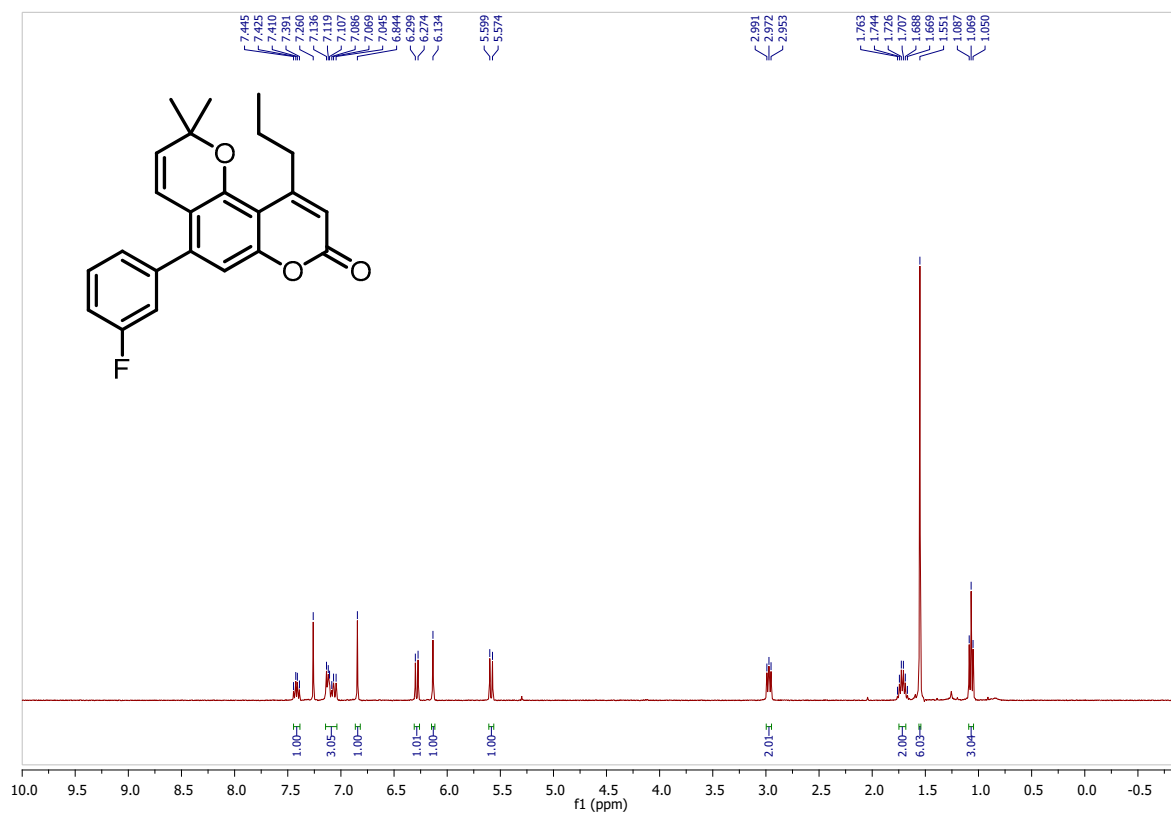

Supplementary Figure S30. <sup>1</sup>H NMR spectrum of 7b



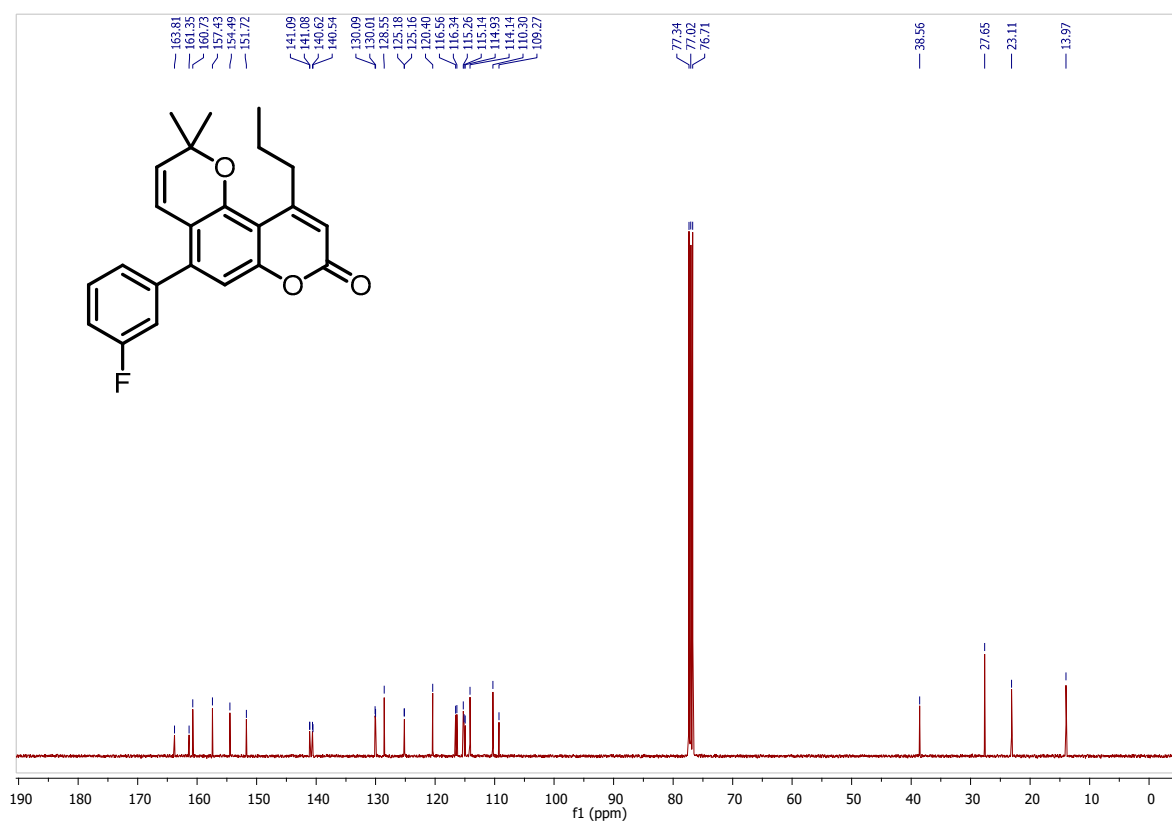

Supplementary Figure S31.  $^{13}\text{C}$  NMR spectrum of 7b

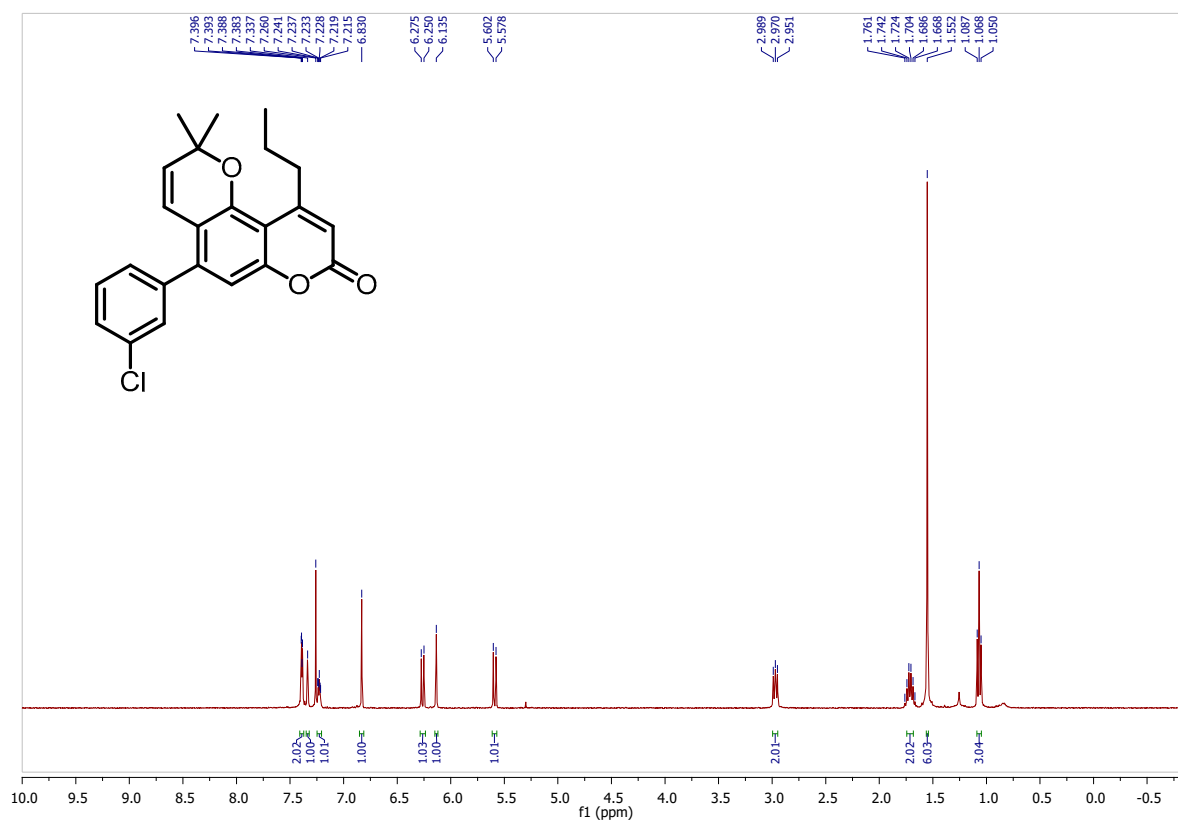

Supplementary Figure S32.  $^1\text{H}$  NMR spectrum of 7c

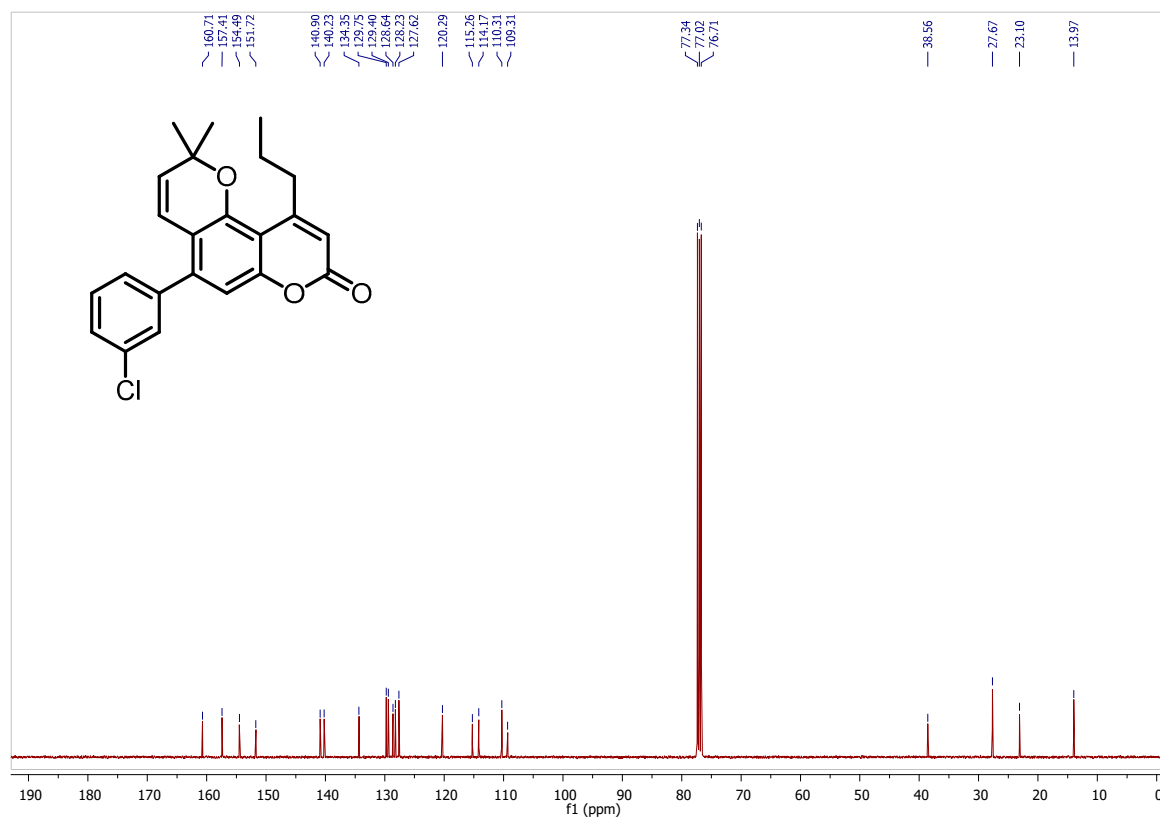

Supplementary Figure S33. <sup>13</sup>C NMR spectrum of 7c

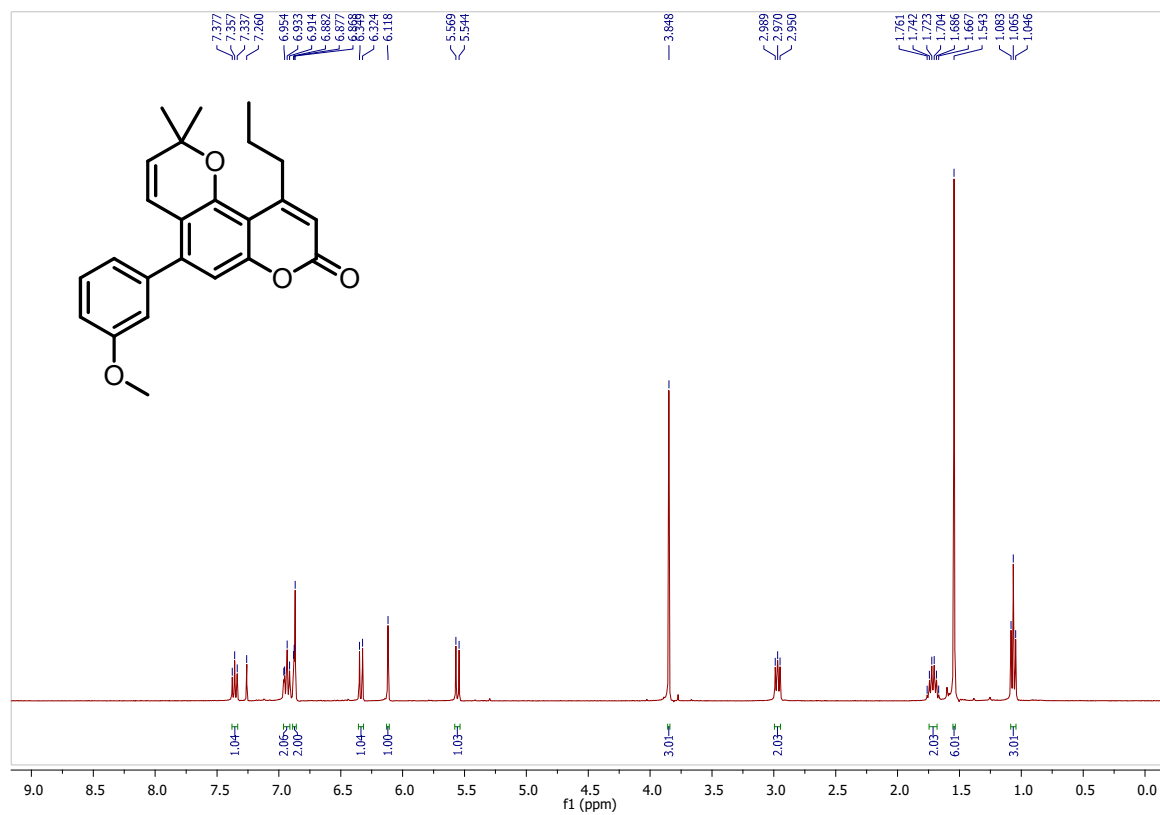

Supplementary Figure S34. <sup>1</sup>H NMR spectrum of 7d

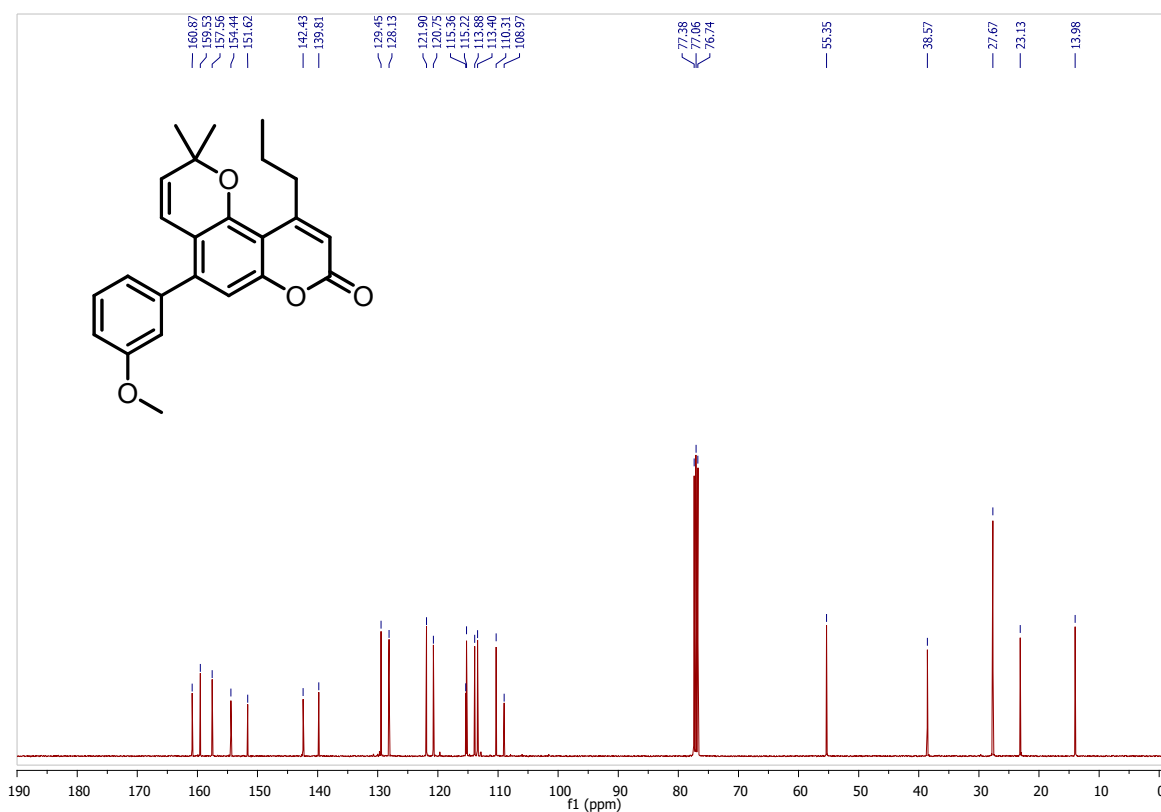

Supplementary Figure S35. <sup>13</sup>C NMR spectrum of 7d

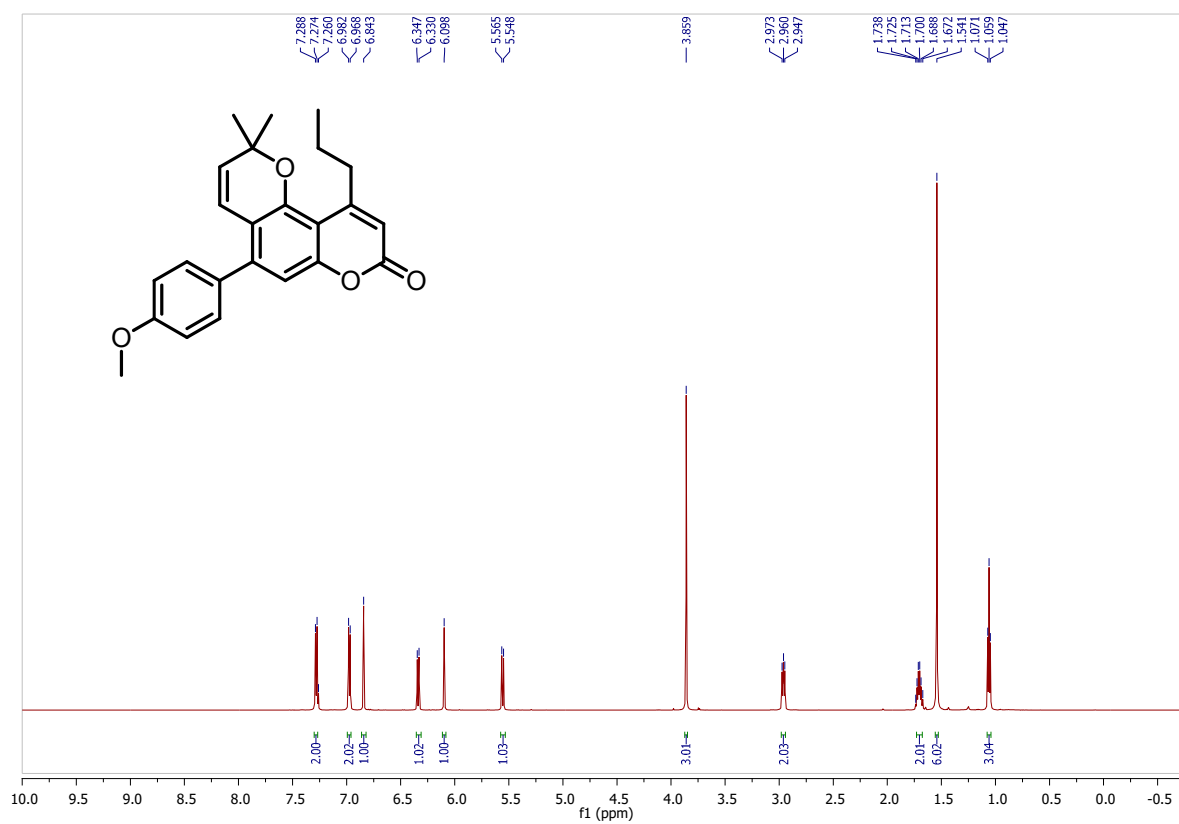

Supplementary Figure S36. <sup>1</sup>H NMR spectrum of 7e

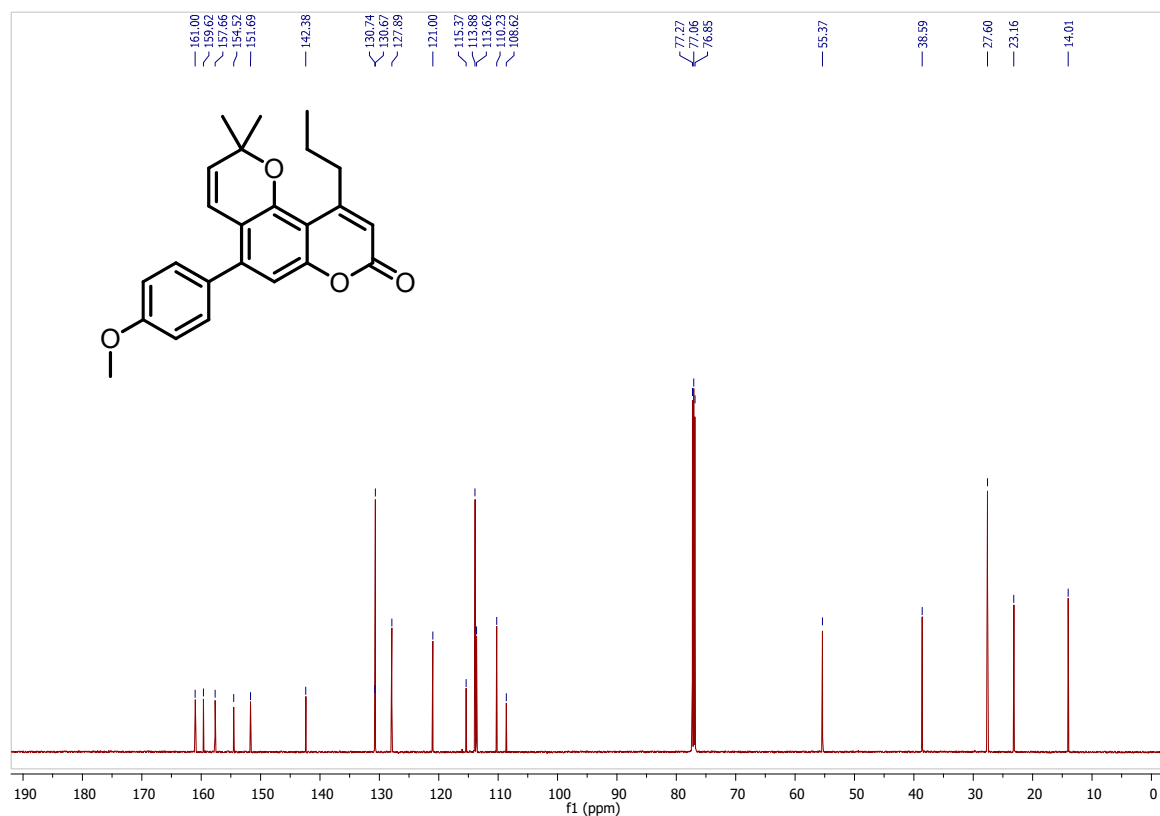

Supplementary Figure S37. <sup>13</sup>C NMR spectrum of 7e

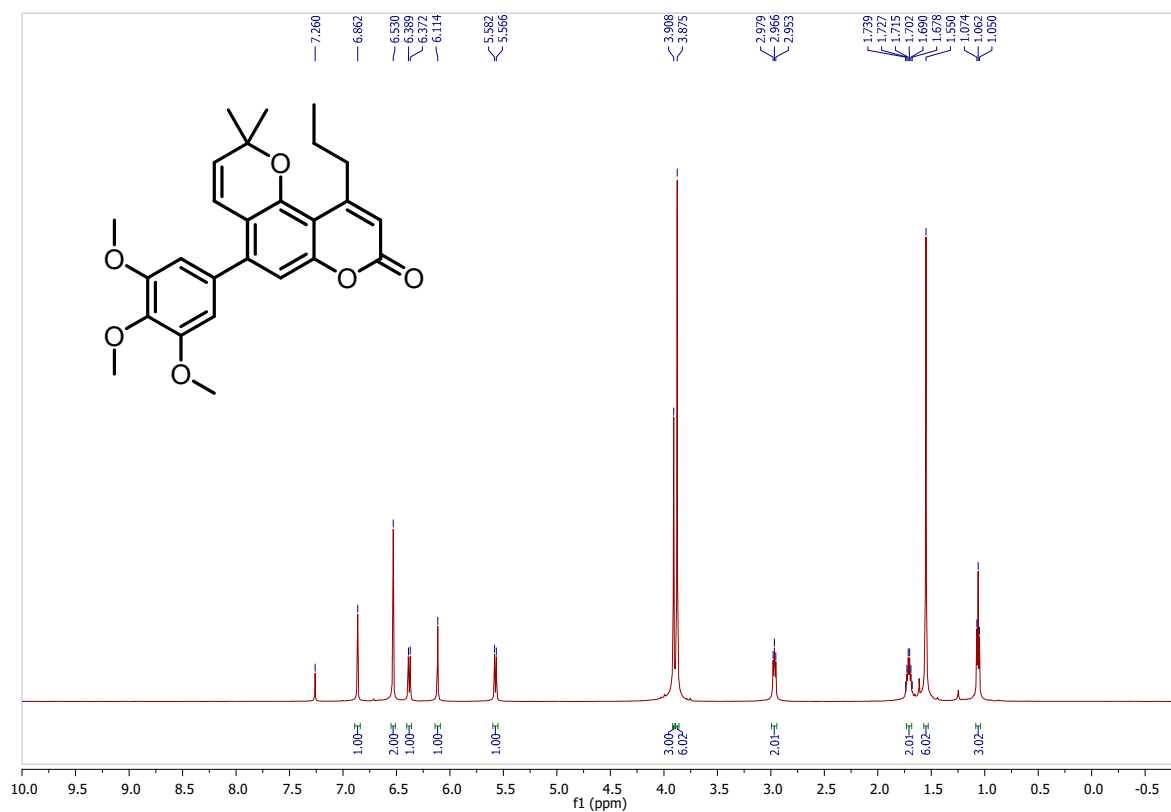

Supplementary Figure S38. <sup>1</sup>H NMR spectrum of 7f

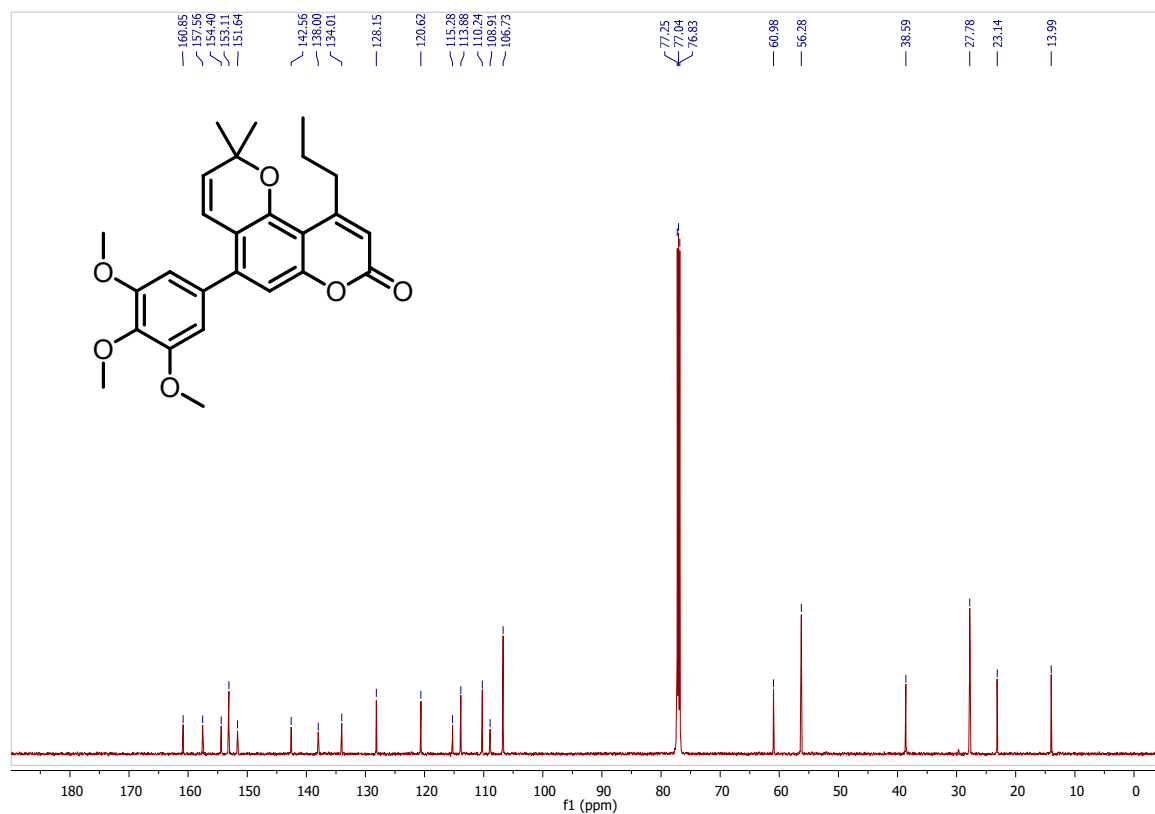

Supplementary Figure S39. <sup>13</sup>C NMR spectrum of 7f

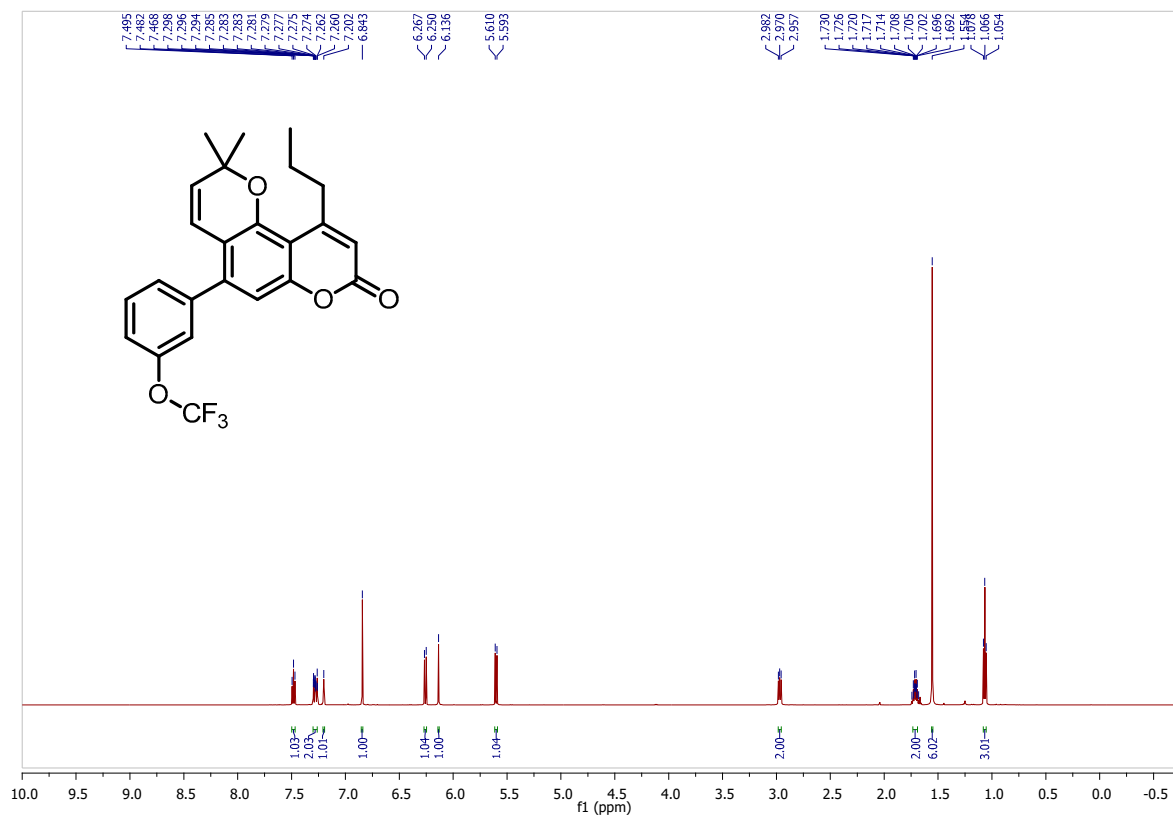

Supplementary Figure S40. <sup>1</sup>H NMR spectrum of 7g

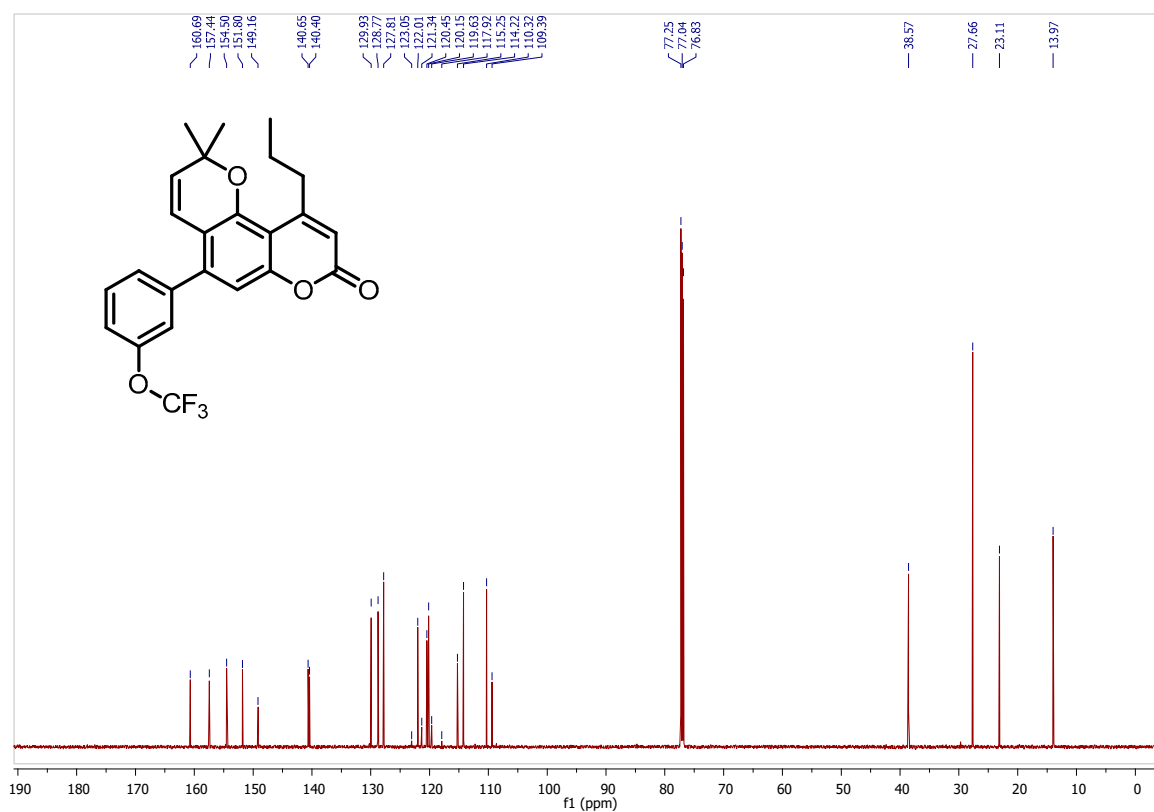

Supplementary Figure S41. <sup>13</sup>C NMR spectrum of 7g

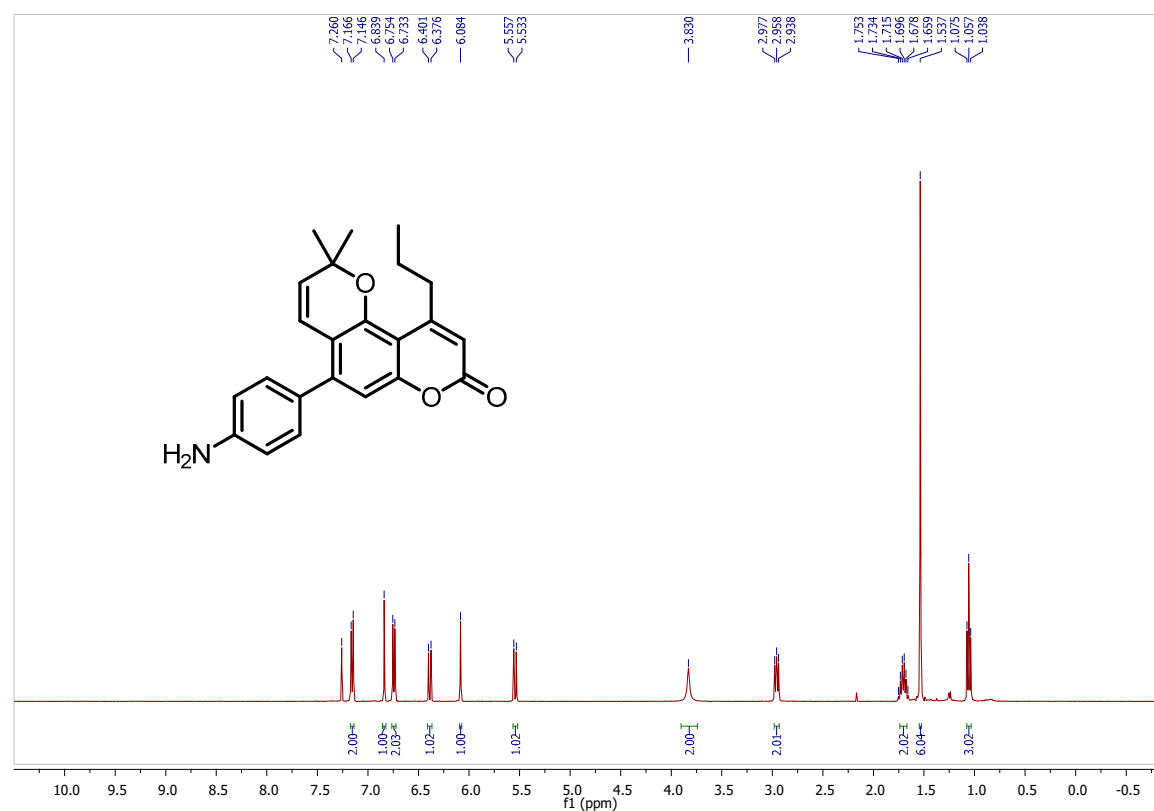

Supplementary Figure S42. <sup>1</sup>H NMR spectrum of 7h

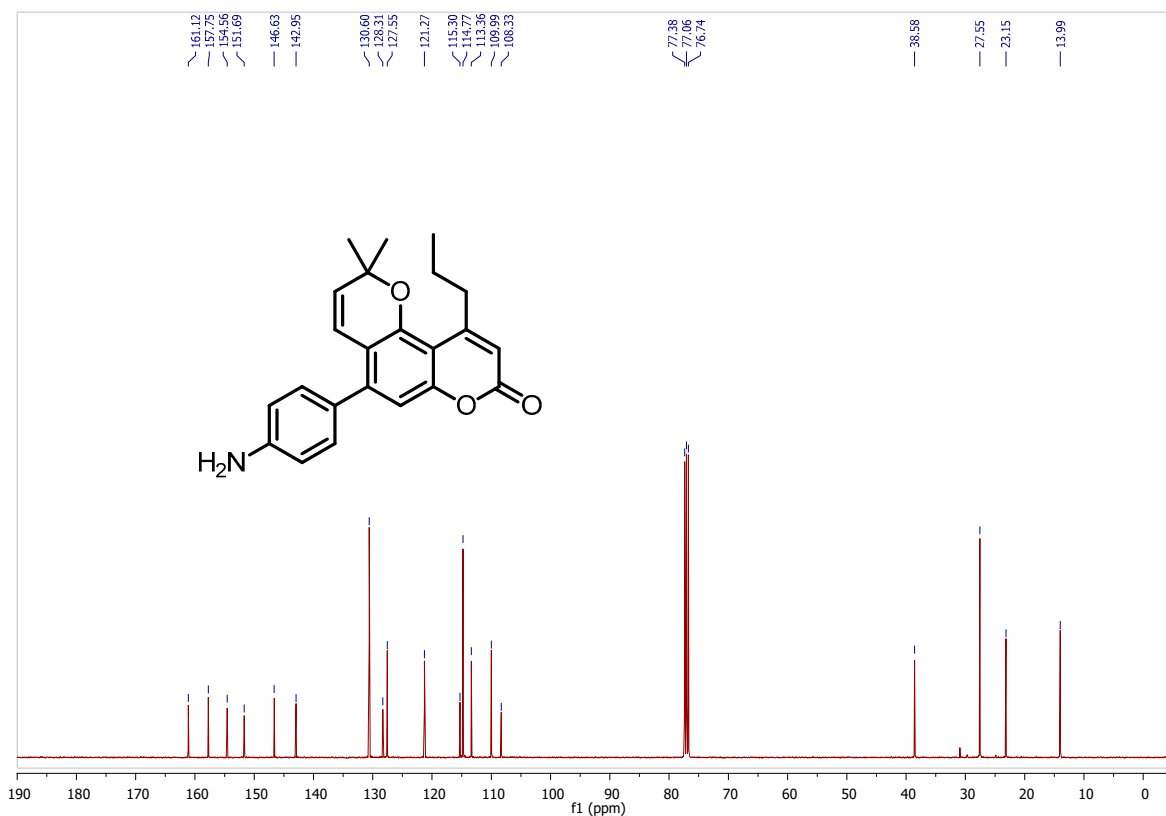

Supplementary Figure S43. <sup>13</sup>C NMR spectrum of 7h

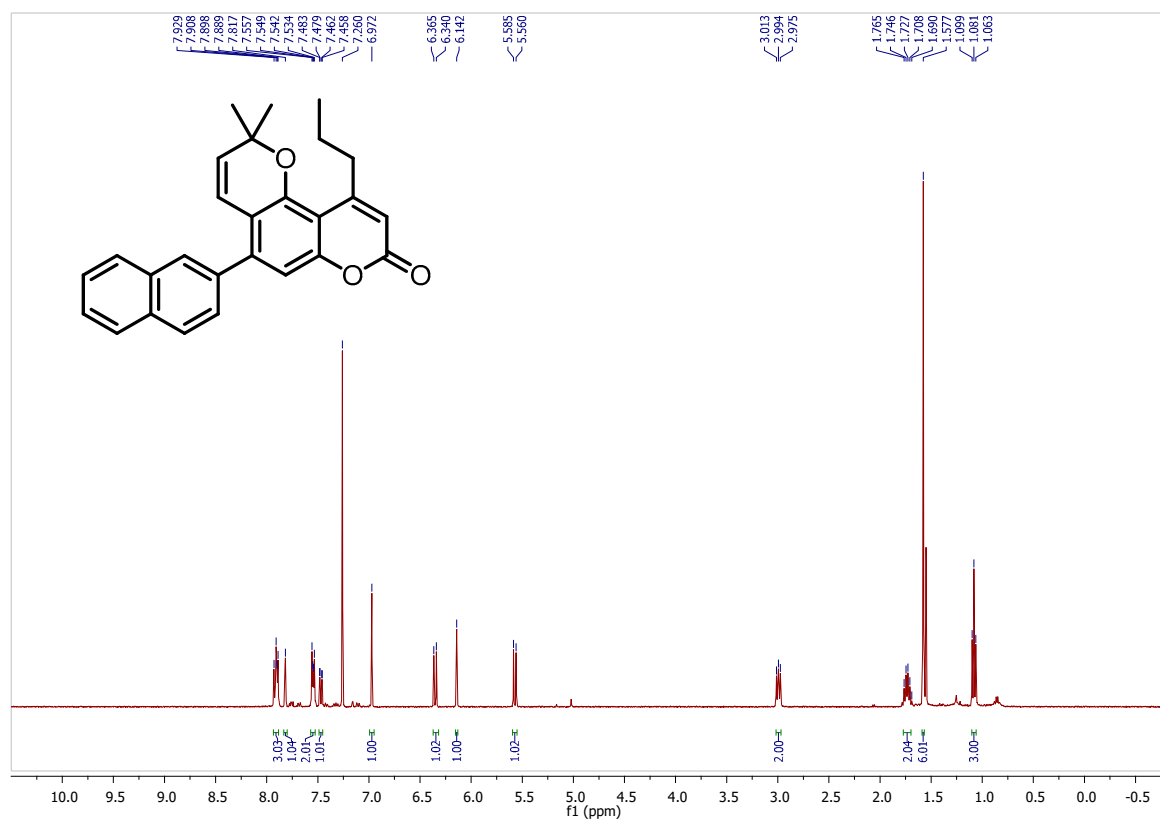

Supplementary Figure S44. <sup>1</sup>H NMR spectrum of 7i

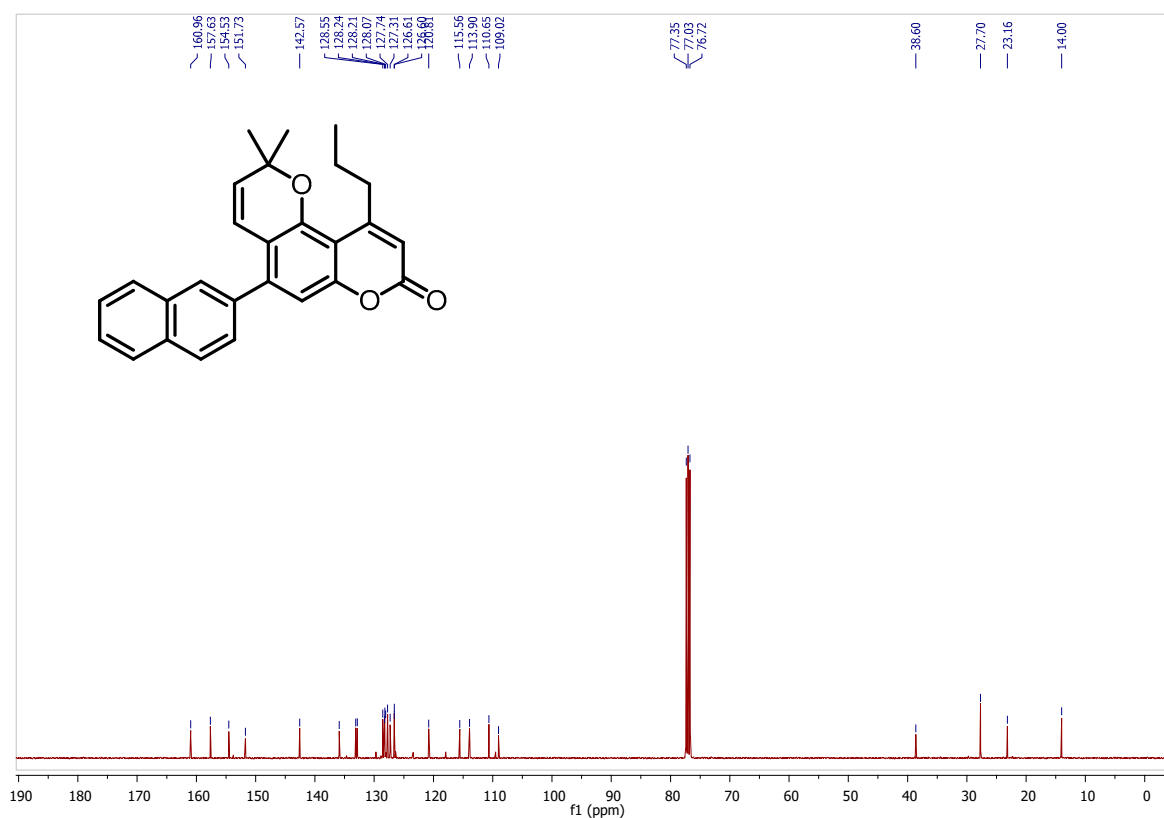

Supplementary Figure S45. <sup>13</sup>C NMR spectrum of 7i

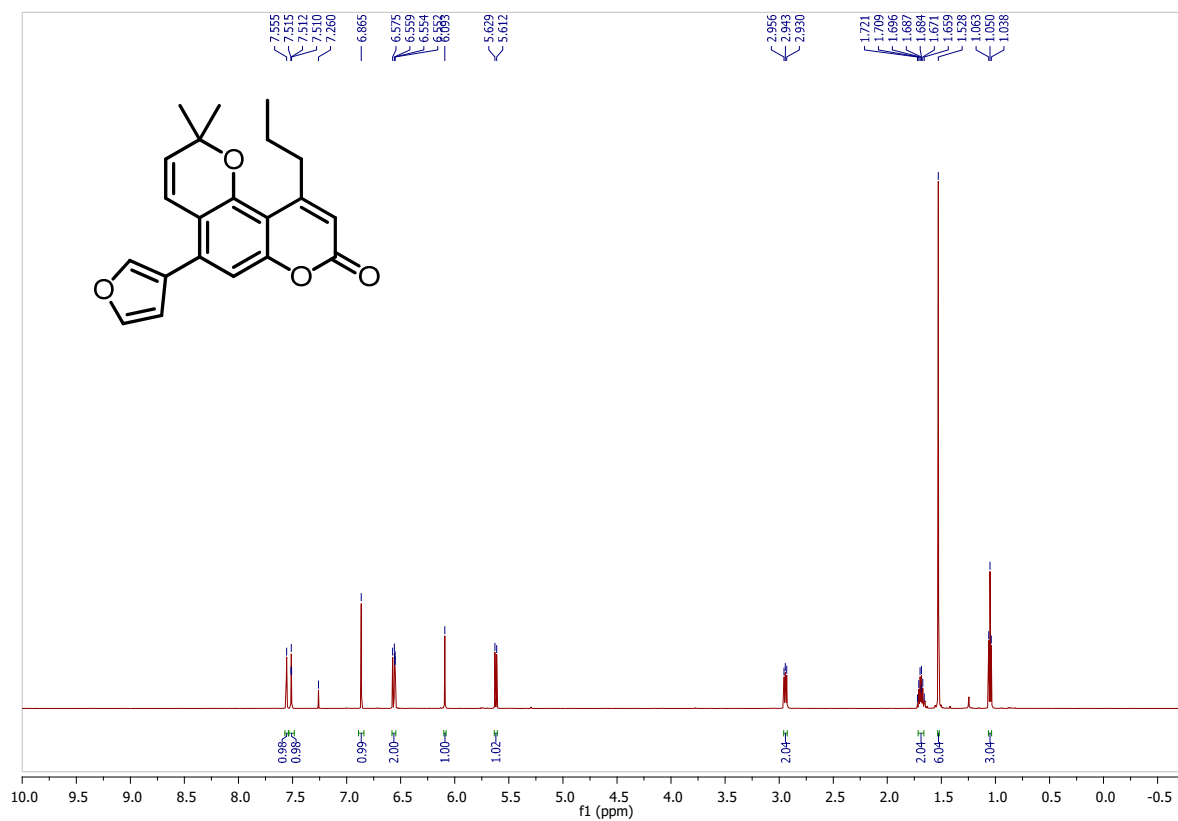

Supplementary Figure S46. <sup>1</sup>H NMR spectrum of 7g



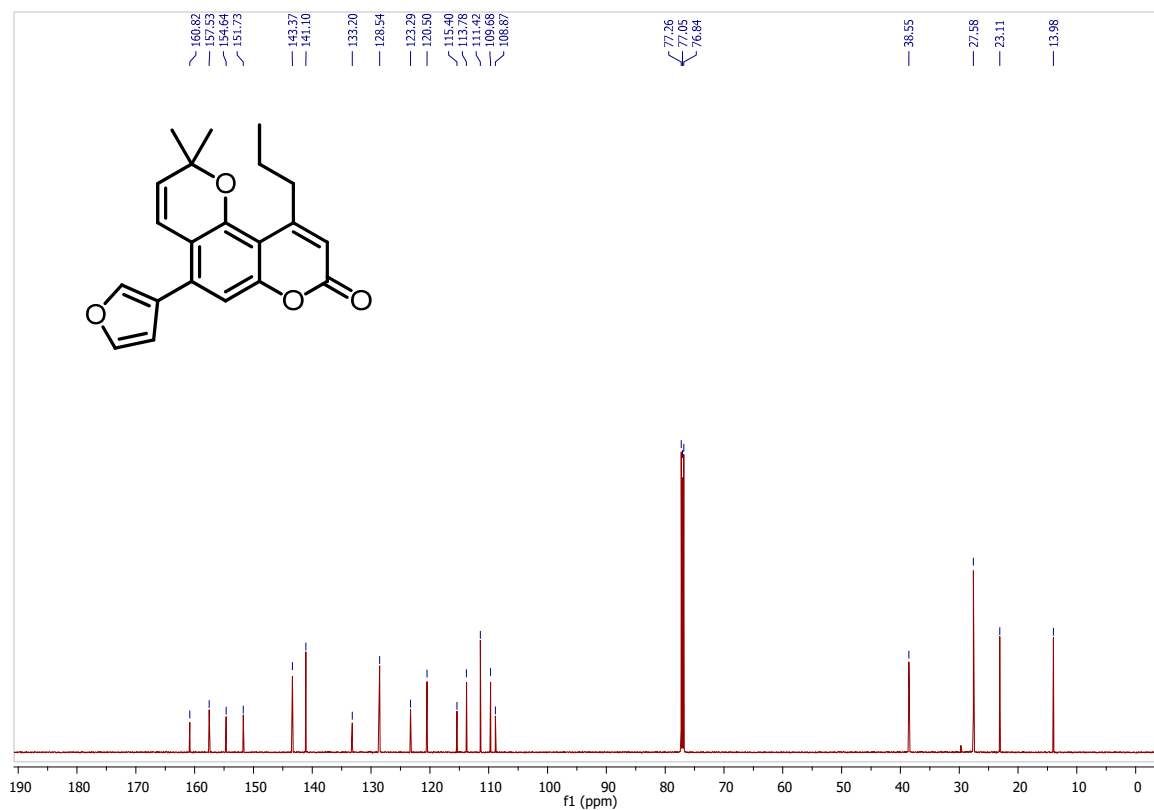

Supplementary Figure S47. <sup>13</sup>C NMR spectrum of 7g

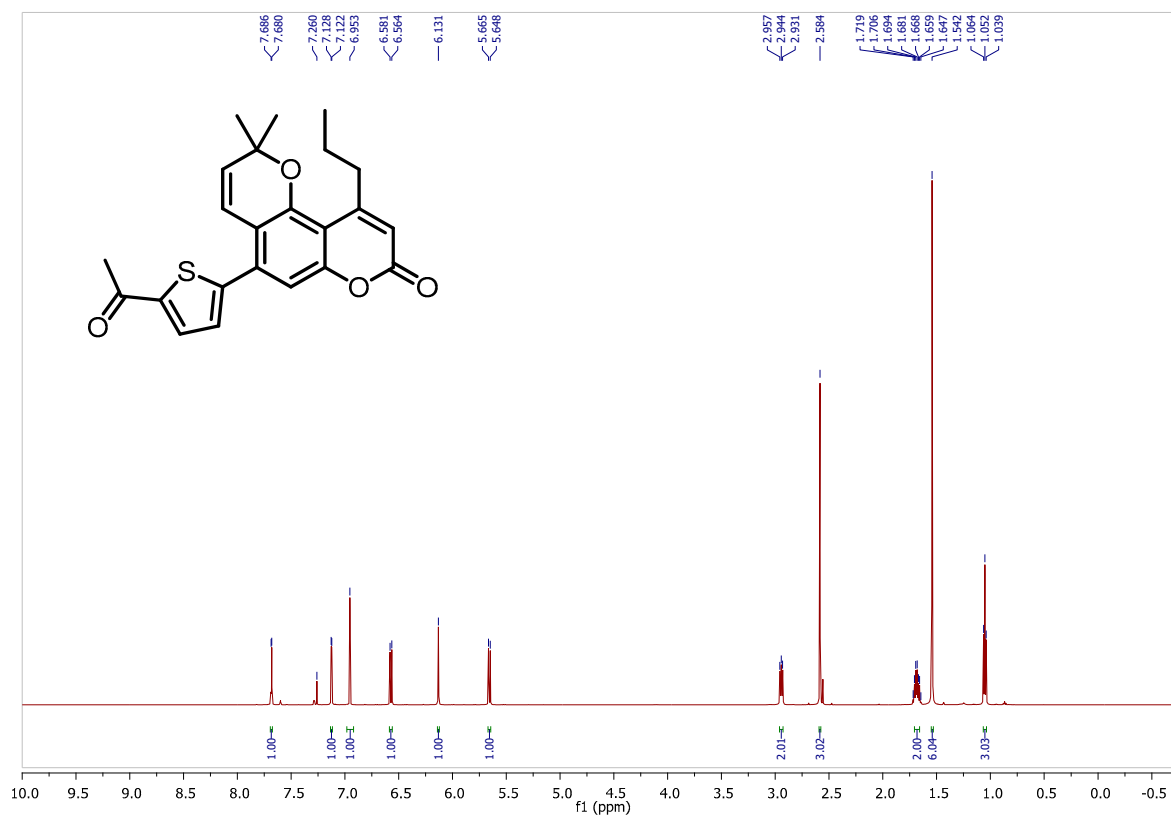

Supplementary Figure S48. <sup>1</sup>H NMR spectrum of 7k

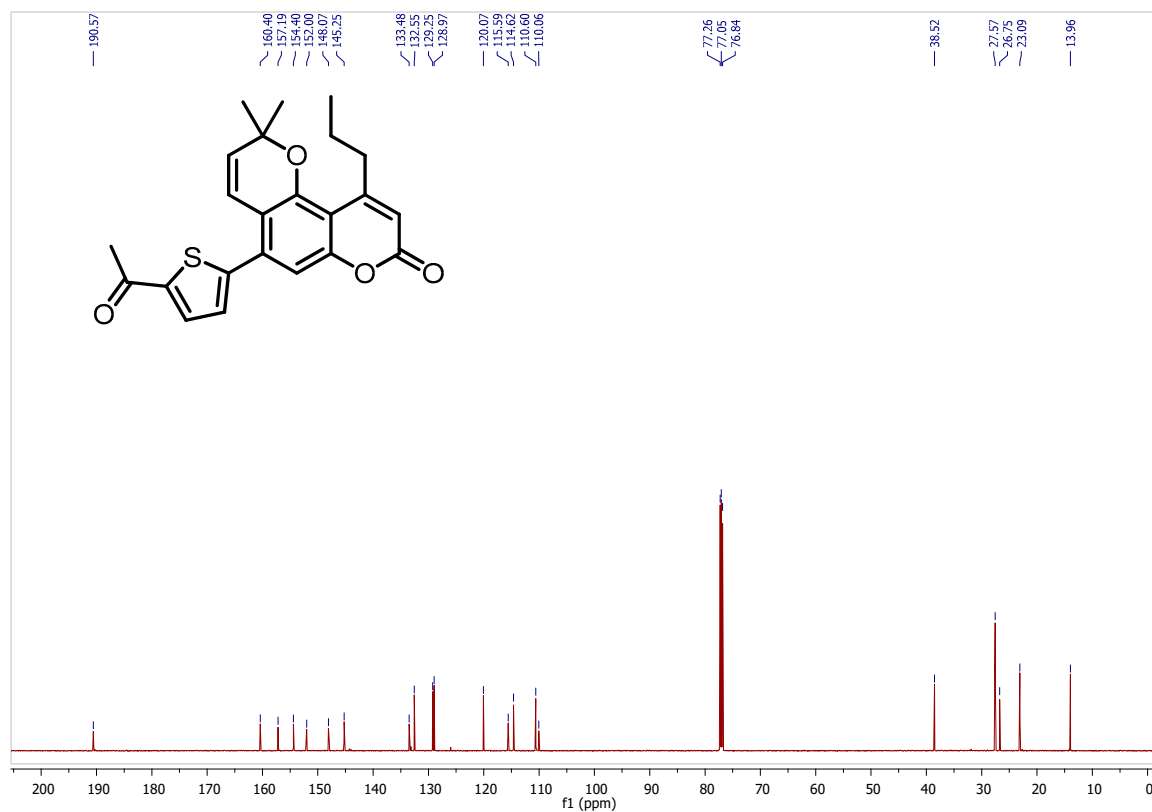

Supplementary Figure S49. <sup>13</sup>C NMR spectrum of 7k

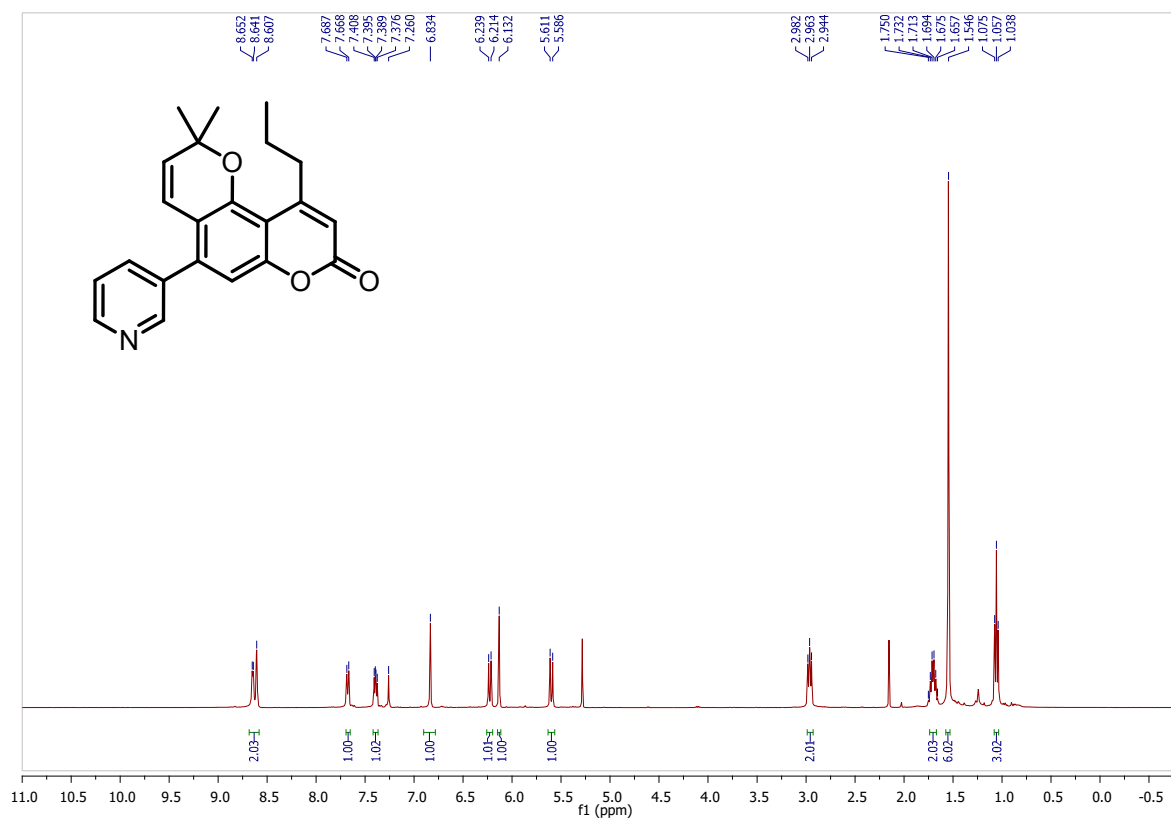

Supplementary Figure S50. <sup>1</sup>H NMR spectrum of 7l

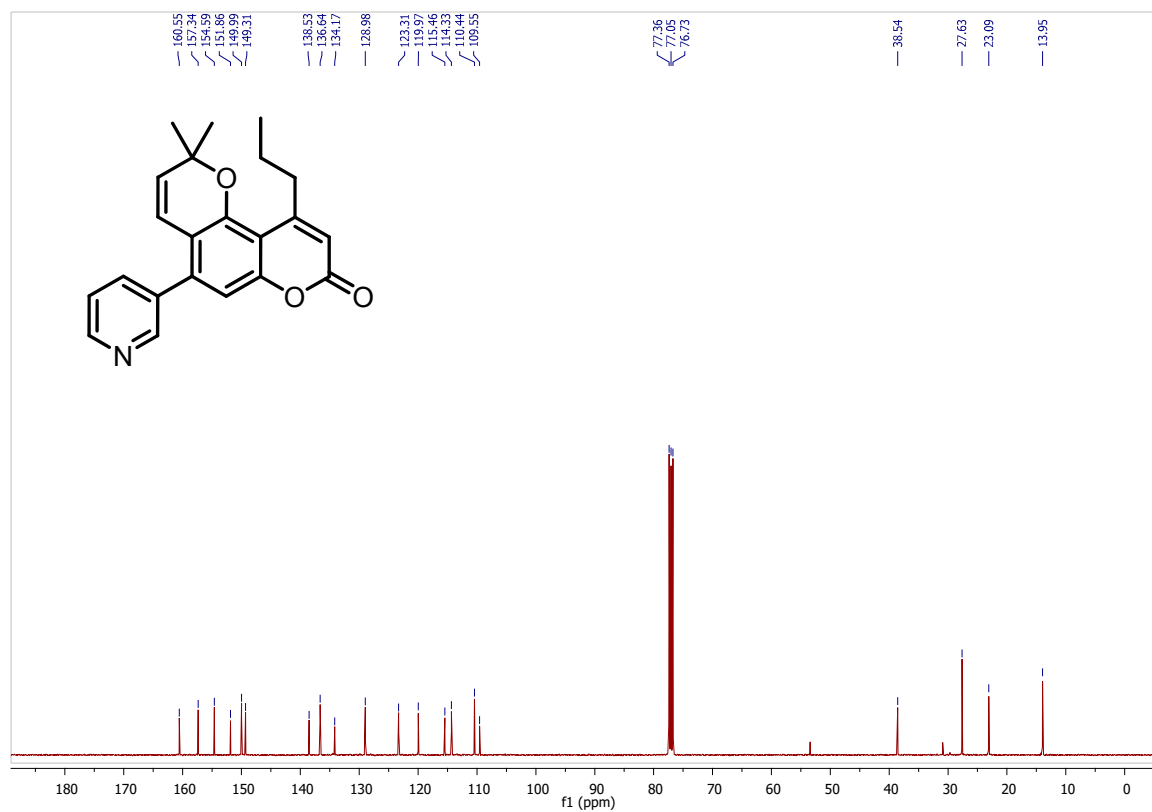

Supplementary Figure S51. <sup>13</sup>C NMR spectrum of 7l

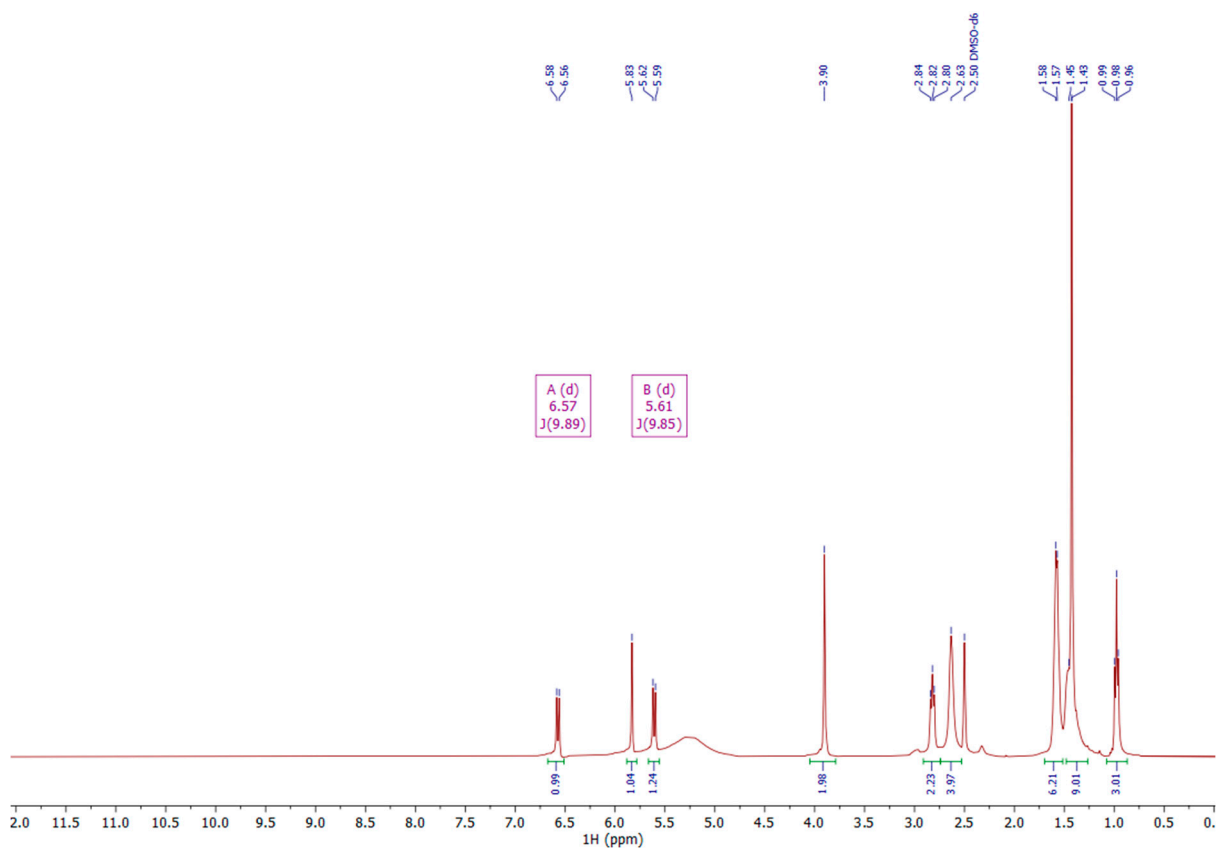

Supplementary Figure S52. <sup>1</sup>H NMR spectrum of 9a

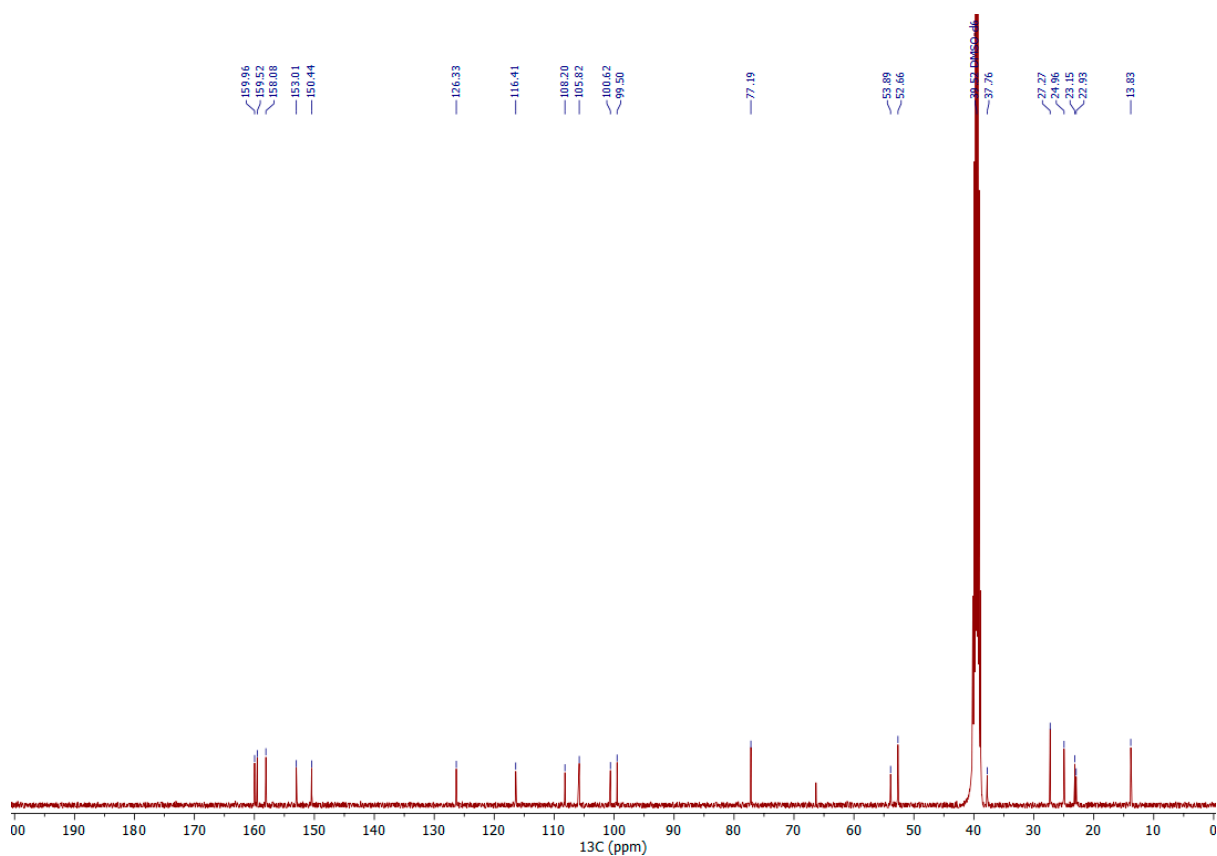

Supplementary Figure S53.  $^{13}\text{C}$  NMR spectrum of 9a

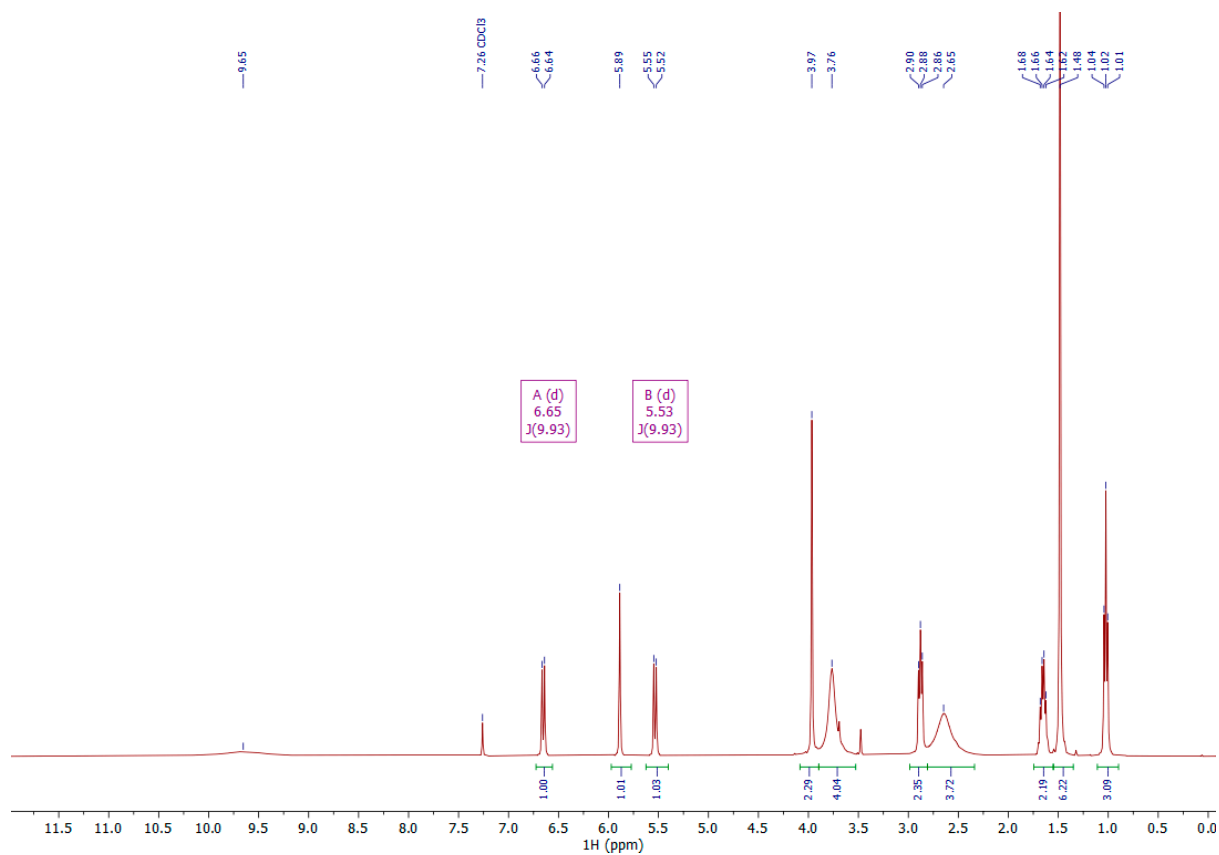

Supplementary Figure S54.  $^1\text{H}$  NMR spectrum of 9b

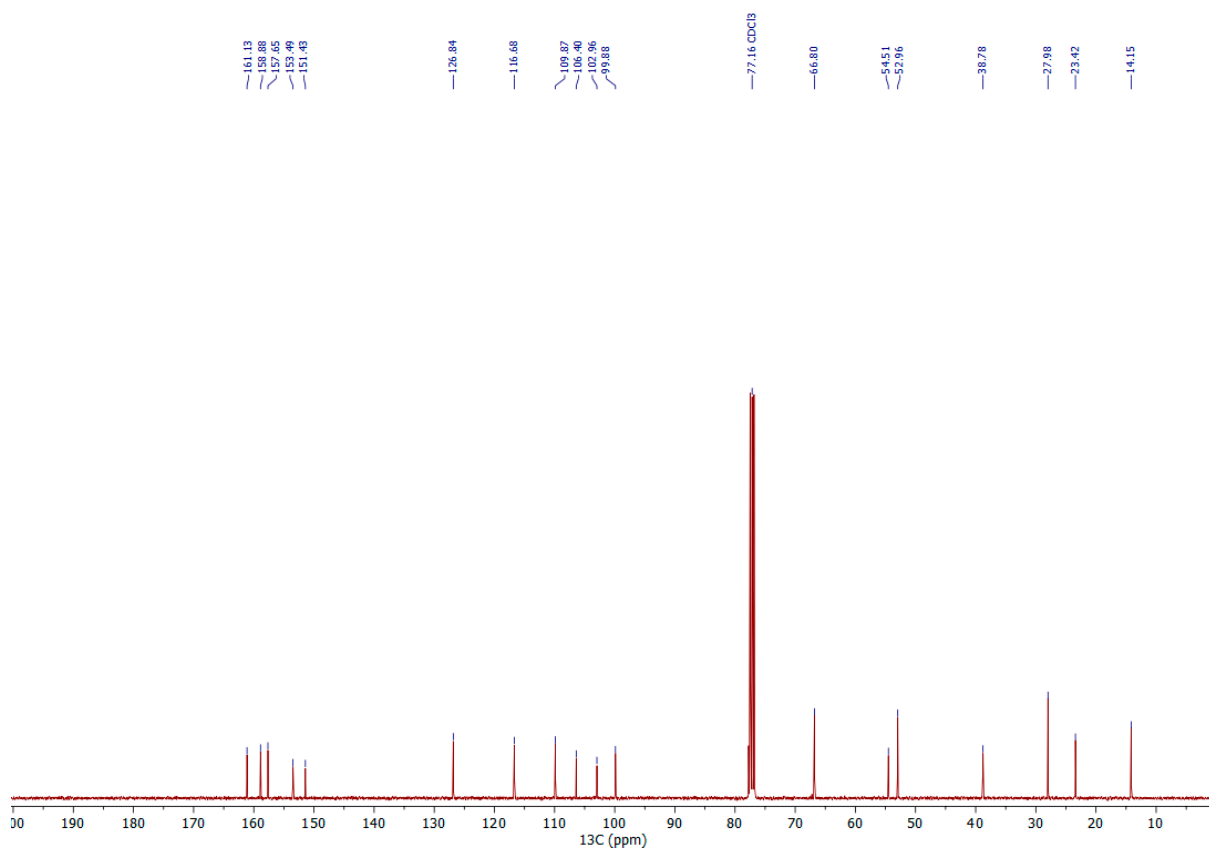

Supplementary Figure S55. <sup>13</sup>C NMR spectrum of 9b

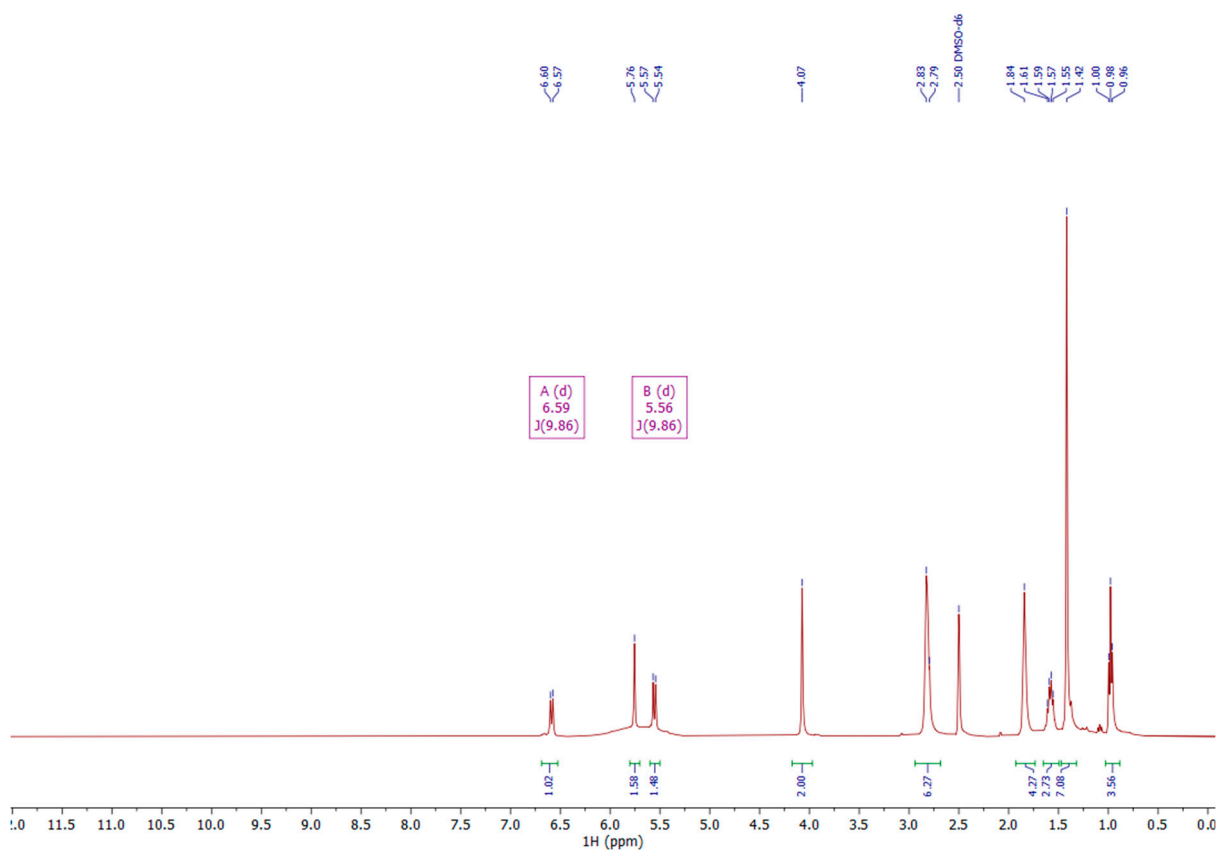

Supplementary Figure S56. <sup>1</sup>H NMR spectrum of 9c

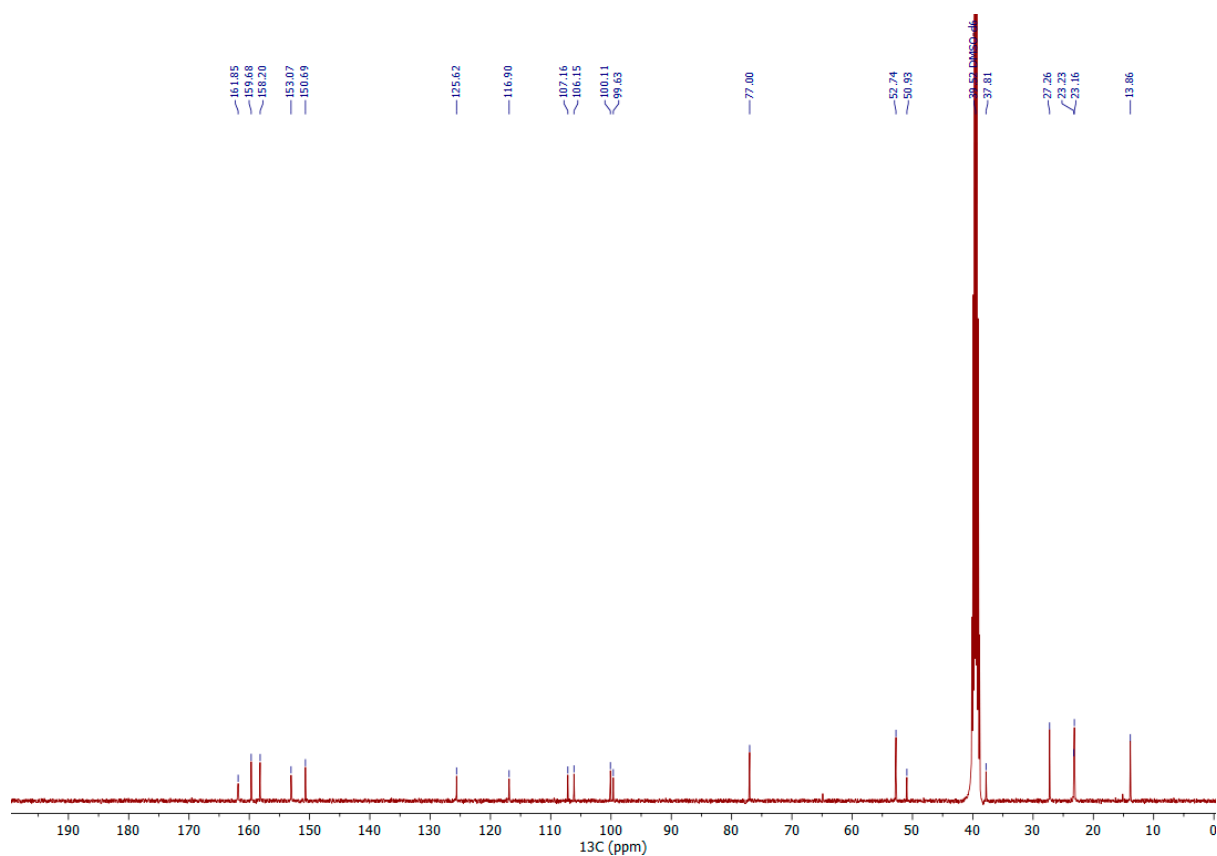

**Supplementary Figure S57. <sup>13</sup>C NMR spectrum of 9c**

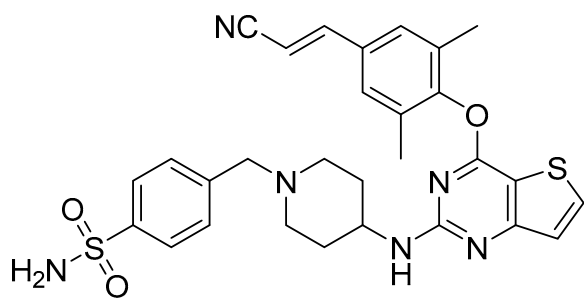

**Supplementary Figure S58. Structure of CHEMBL4094163**

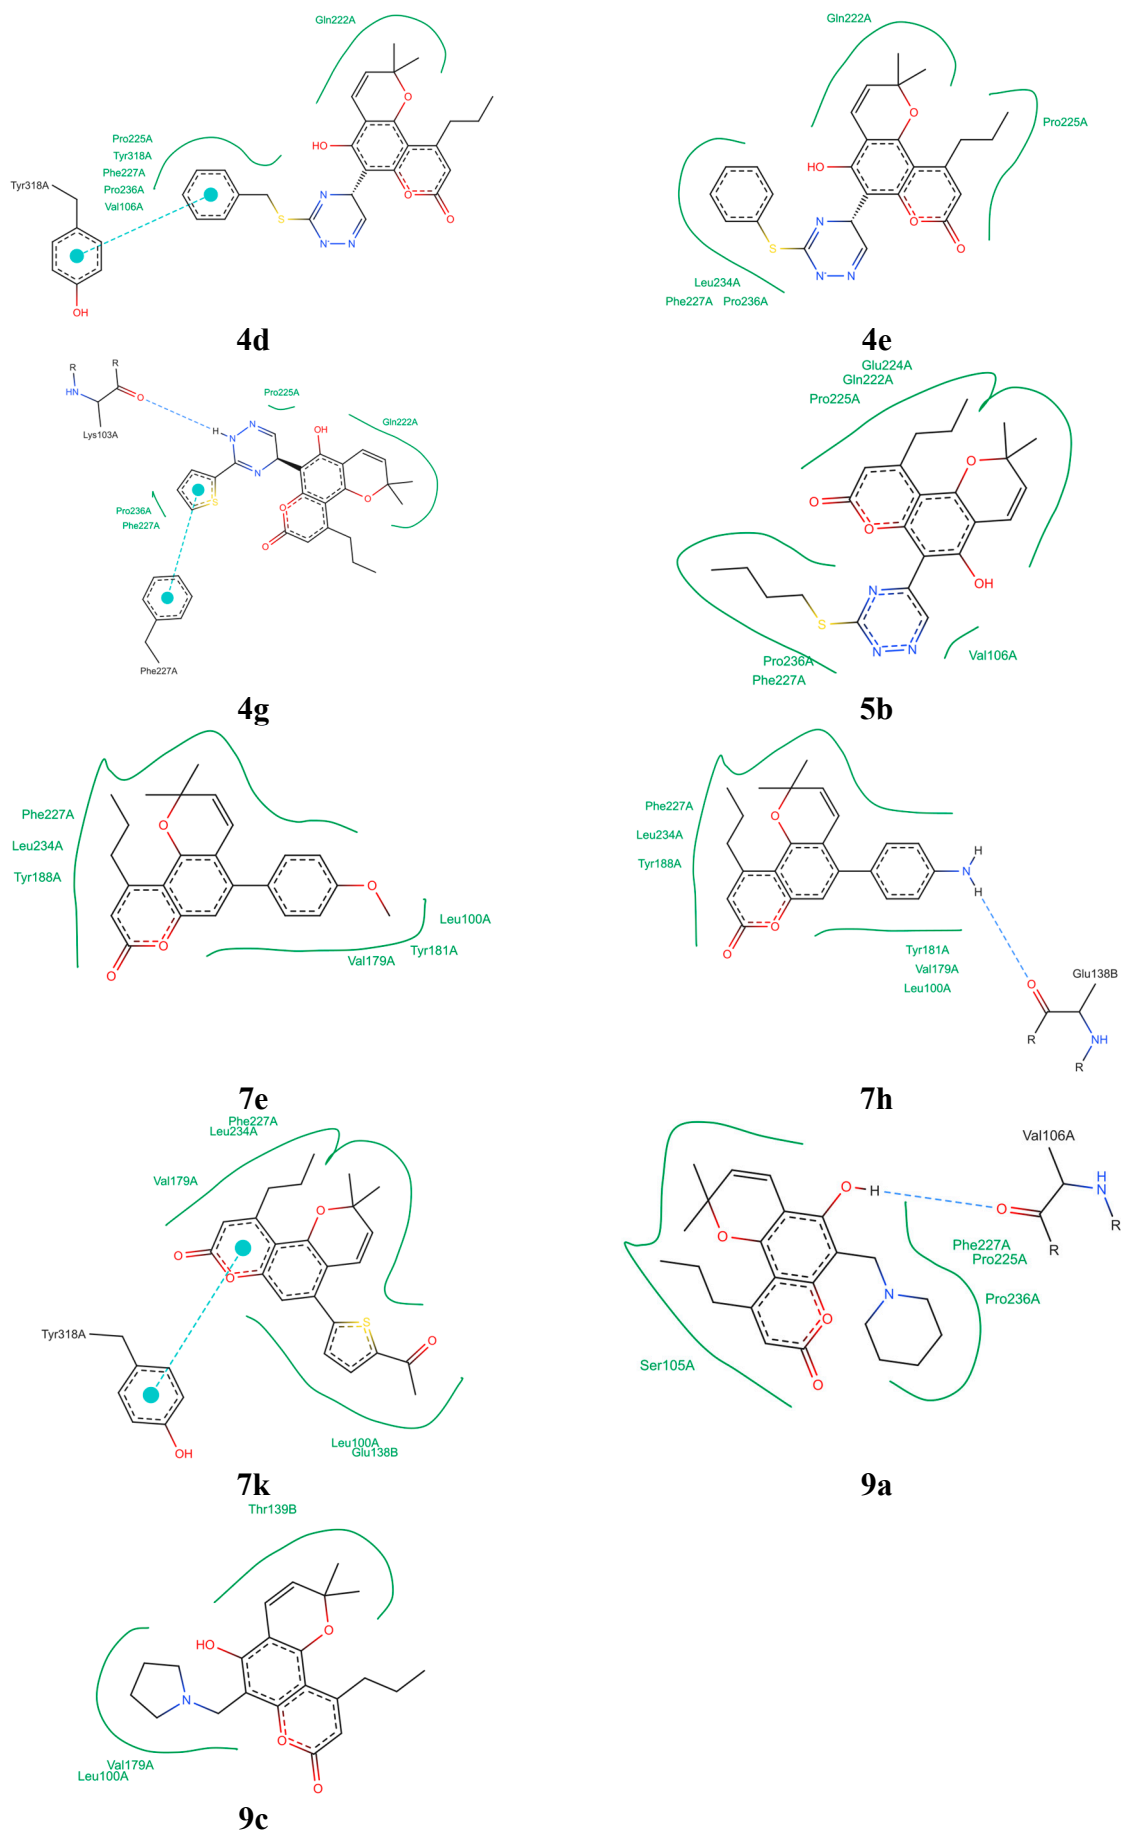

**Supplementary Figure S59. Two-dimensional maps of non-covalent interactions for the top-1 positions of docked ligands in HIV-RT non-nucleoside binding site**

**Supplementary Table S1. The results of docking of the known non-nucleoside inhibitors of HIV-1 RT WT**

| No | Structure            | Jamda score | IC <sub>50</sub> , nM | References |
|----|----------------------|-------------|-----------------------|------------|
| 1  |                      | -2.39       | 2500                  | [30]       |
| 2  |                      | -2.79       | 6900                  |            |
| 3  |                      | -2.37       | 11200                 |            |
| 4  |                      | -2.60       | 22200                 |            |
| 5  |                      | -1.95       | 32100                 |            |
| 6  |                      | -3.36       | 195                   | [31]       |
| 7  |                      | -3.23       | 1115                  | [32]       |
| 8  |                      | -3.13       | 180                   | [33]       |
| 9  |                      | -2.64       | 6400                  | [34]       |
| 10 |                      | -2.51       | 24                    | [35]       |
| 11 |                      | -2.50       | 3800                  | [36]       |
|    | Pearson coefficient  | 0.66        |                       |            |
|    | Spearman coefficient | 0.54        |                       |            |
